# Supplementary material
Source: PubMed Central journal article supplement (PMC4010291)
Supplement: np4009865_si_001.pdf [file np4009865_si_001.pdf]

# Supporting information for

## Total Synthesis of the Lipid Mediator PD1<sub>n-3</sub> DPA: Configurational Assignments, Anti-inflammatory and Pro-resolving Actions

Marius Aursnes<sup>†</sup>, Jørn E. Tungen<sup>†</sup>, Anders Vik<sup>†</sup>, Romain Colas<sup>‡</sup>, Chien-Yee C. Cheng<sup>‡</sup>, Jesmond Dalli<sup>‡</sup>, Charles N. Serhan<sup>‡</sup> and Trond V. Hansen<sup>\*,†,‡,§</sup>

<sup>†</sup>School of Pharmacy, Department of Pharmaceutical Chemistry, University of Oslo, PO Box 1068 Blindern, N-0316 Oslo, Norway

<sup>‡</sup>Center for Experimental Therapeutics and Reperfusion Injury, Department of Anesthesiology, Perioperative and Pain Medicine, Harvard Institutes of Medicine, Brigham and Women's Hospital and Harvard Medical School, Boston, Massachusetts. 02115.

\* E-mail: t.v.hansen@farmasi.uio.no

### Table of Contents:

|                                                                                                             |     |
|-------------------------------------------------------------------------------------------------------------|-----|
| General Information.....                                                                                    | S1  |
| Synthesis of compound <b>15</b> .....                                                                       | S2  |
| Synthesis of compound <b>12</b> .....                                                                       | S2  |
| Synthesis of compound <b>7</b> .....                                                                        | S5  |
| NMR Spectra of Compounds <b>6-7</b> , <b>14</b> , <b>15</b> , <b>18</b> and <b>19</b> (Figures S1-S17)..... | S7  |
| HPLC Chromatograms of <b>5</b> , <b>6</b> , <b>14</b> and <b>25</b> (Figures S18-S21).....                  | S16 |
| UV/Vis Chromatograms of <b>6</b> and <b>5</b> (Figures S22 and S23).....                                    | S18 |
| MS-MS spectra of endogenously produced <b>5</b> and synthetic <b>5</b> (Figure S24).....                    | S19 |
| Physical properties of synthetic <b>5</b> determined by GC-MS (Figure S25).....                             | S20 |
| Table S1 - m/z values of synthetic <b>5</b> determined by GC-MS analysis.....                               | S21 |
| Methanol trapping products (Figure S26).....                                                                | S22 |
| References.....                                                                                             | S23 |

### General Information

Unless stated otherwise, all commercially available reagents and solvents were used in the form they were supplied without any further purification. The stated yields are based on isolated material. Thin layer chromatography was performed on silica gel 60 F254 aluminum-backed plates fabricated by Merck. Flash column chromatography was performed on silica gel 60 (40-63  $\mu\text{m}$ ) produced by Merck. NMR spectra were recorded on a Bruker DRX500, Bruker AVII400 or a Bruker DPX300 spectrometer at 500 MHz, 400 MHz or 300 MHz respectively for  $^1\text{H}$  NMR and at 126 MHz, 100 MHz or 75 MHz respectively for  $^{13}\text{C}$  NMR. Coupling constants ( $J$ ) are reported in hertz and chemical shifts are reported in parts per million ( $\delta$ ) relative to the central residual protium solvent resonance in  $^1\text{H}$  NMR ( $\text{CDCl}_3 = \delta$  7.27,  $\text{DMSO}-d_6 = \delta$  2.50 and  $\text{MeOH}-d_4 = \delta$  3.31) and the central carbon solvent resonance in  $^{13}\text{C}$  NMR ( $\text{CDCl}_3 = \delta$  77.00 ppm,  $\text{DMSO}-d_6 = \delta$  39.43 and  $\text{MeOH}-d_4 = \delta$  49.00). Mass spectra were recorded at 70 eV on Waters Prospec Q spectrometer using EI, ES or CI as the methods of ionization. High resolution mass spectra were recorded on Waters Prospec Q spectrometer using EI or ES as the methods of ionization. Optical rotations were measured using a 1 mL cell with a 1.0 dm path length on a Perkin Elmer 341 polarimeter. HPLC analyses were performed on an Agilent Technologies 1200 Series instrument with diode array detector set at 254 nm and equipped with a C18 stationary phase (Eclipse XDB-C18  $5\mu\text{m}$   $4.6 \times 150$  mm), applying the conditions stated. The UV/Vis spectra from 190-900 nm were recorded using a Biochrom Libra S32PC spectrometer using quartz cuvettes. Diastereomeric ratios reported in this paper have not been validated by calibration.

**(*S,Z*)-tert-Butyldimethyl(oct-5-en-1-yn-3-yloxy)silane (15).**

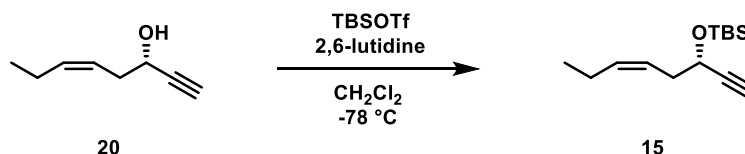

2,6-Lutidine (843 mg, 7.98 mmol, 3.0 equiv.) and TBSOTf (843 mg, 3.19 mmol, 1.2 equiv.) were added to a solution of known<sup>1</sup> (*S*)-oct-5*Z*-en-1-yn-3-ol (**20**) (330 mg, 2.66 mmol, 1 equiv.) in CH<sub>2</sub>Cl<sub>2</sub> (26 mL) at -78 °C. The reaction was stirred at that temperature for 4 h before it was quenched with saturated aq. NH<sub>4</sub>Cl (15 mL). The layers were separated and the aqueous layer was extracted with CH<sub>2</sub>Cl<sub>2</sub> (3 x 20 mL). The combined organic layers were dried (Na<sub>2</sub>SO<sub>4</sub>), before concentrated *in vacuo*. The crude product was purified by column chromatography on silica (hexanes/EtOAc 98:2) to afford the title compound **15** as a colourless oil. Yield: 513 mg (81%); [α]<sub>D</sub><sup>20</sup> +21 (c 0.07, CHCl<sub>3</sub>); <sup>1</sup>H NMR (300 MHz, CDCl<sub>3</sub>) δ 5.57 – 5.36 (m, 2H), 4.34 (td, *J* = 6.6, 2.1 Hz, 1H), 2.45 (dd, *J* = 7.1, 0.6 Hz, 2H), 2.38 (d, *J* = 2.1 Hz, 1H), 2.07 (p, *J* = 7.1 Hz, 2H), 0.97 (t, *J* = 7.5 Hz, 3H), 0.91 (s, 9H), 0.14 (s, 3H), 0.11 (s, 3H); <sup>13</sup>C NMR (101 MHz, CDCl<sub>3</sub>) δ 134.6, 123.8, 85.6, 72.2, 63.0, 36.7, 25.9 (3C), 20.9, 18.4, 14.4, -4.5, -4.9. TLC (hexanes/EtOAc 95:5, CAM stain): *R*<sub>f</sub> = 0.66.

**(*S*)-1-(4-Isopropyl-2-thioxothiazolidin-3-yl)ethan-1-one (22).**

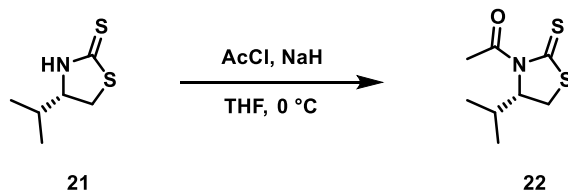

Nagao's chiral auxiliary **22** was prepared from commercially available (*S*)-4-isopropylthiazolidine-2-thione (**21**) by using the procedure of Nagao *et al.*<sup>2</sup> To thiazolidine (**21**) (7.20 g, 44.6 mmol, 1.0 equiv.) in THF (225 mL), 60% NaH dispersion in mineral oil (1.28 g, 53.4 mmol, 1.2 equiv.) was slowly added at 0 °C. The reaction mixture was stirred for 15 min at 0 °C, and acetyl chloride (4.19 g, 53.4 mmol, 1.2 equiv.) was added dropwise. The reaction mixture was stirred for 30 min at 0 °C, upon which it was warmed to room temperature and allowed to stir for 2 h. The reaction was quenched with saturated NH<sub>4</sub>Cl (60 mL) and the layers were separated. The aqueous layer was extracted with EtOAc (2 x 60 mL) and the combined organic layers were dried (Na<sub>2</sub>SO<sub>4</sub>), filtered, and concentrated *in vacuo*. The crude product was purified by column chromatography on silica (hexanes/EtOAc 9:1) to afford the title compound **22** as a yellow oil. All spectroscopic and physical data were in full agreement with those reported in the literature.<sup>2</sup> Yield: 7.88 g (87%); [α]<sub>D</sub><sup>20</sup> +434 (c 0.26, CHCl<sub>3</sub>); <sup>1</sup>H NMR (300 MHz, CDCl<sub>3</sub>) δ 5.14 (ddd, *J* = 7.6, 6.2, 1.2 Hz, 1H), 3.50 (dd, *J* = 11.5, 8.0 Hz, 1H), 3.02 (dd, *J* = 11.5, 1.2 Hz, 1H), 2.77 (s, 3H), 2.48 – 2.25 (m, 1H), 1.06 (d, *J* = 6.8 Hz, 3H), 0.97 (d, *J* = 6.9 Hz, 3H); <sup>13</sup>C NMR (75 MHz, CDCl<sub>3</sub>) δ 203.3, 170.8, 71.4, 30.9, 30.5, 27.0, 19.2, 17.9. TLC (hexanes/EtOAc 4:1, KMnO<sub>4</sub> stain): *R*<sub>f</sub> = 0.35.

**Potassium (1E,3E)-5-oxopenta-1,3-dien-1-olate (23).**

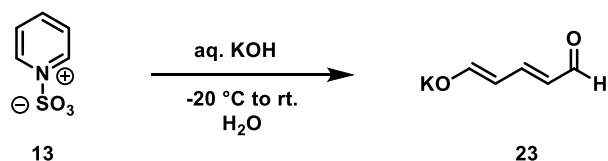

Glutaconaldehyde potassium salt **23** was prepared from commercially available pyridinium-1-sulfonate (**13**) according to the procedure of Becher.<sup>3</sup> Pyridinium salt **13** (technical grade, 60.8 g, 0.38 mol, 1.0 equiv.) is added to a solution of KOH (87.5 g, 1.56 mol, 4.1 equiv.) in H<sub>2</sub>O (210 mL). The solution is stirred at -20 °C for 1 h before the temperature is slowly raised to 20 °C over 4 h. The mixture is heated to 30-40 °C for 30 min before being cooled down to 5 °C. The crude product is filtered, washed with acetone (2 x 80 mL) and dried. The brown-red solid is dissolved in MeOH (2.2 L), heated to reflux before activated carbon was added. The solution was filtrated, concentrated *in vacuo*. The orange crystals were washed with acetone (2 x 80 mL) and dried to afford the title compound **23** as orange crystals. All spectroscopic and physical data were in full agreement with those reported in the literature.<sup>3</sup> Yield: 28.5 g (55%); <sup>1</sup>H NMR (300 MHz, DMSO-*d*<sub>6</sub>) δ 8.67 (d, *J* = 9.2 Hz, 2H), 7.04 (t, *J* = 12.9 Hz, 1H), 5.10 (dd, *J* = 13.0, 9.1 Hz, 2H); <sup>13</sup>C NMR (75 MHz, DMSO-*d*<sub>6</sub>) δ 184.4 (2C), 159.8, 106.2 (2C). M.p.: 354 – 360 °C, decomp. TLC (EtOAc, KMnO<sub>4</sub> stain): *R*<sub>f</sub> = 0.35.

**(2E,4E)-5-Bromopenta-2,4-dienal (24).**

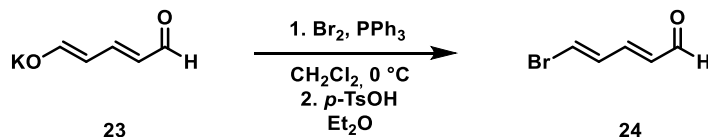

Bromopentadienal **24** was prepared by the bromination of glutaconaldehyde potassium salt **23** according to the protocol reported by Duhamel *et al.*<sup>4</sup> Bromine (12.6 g, 78.8 mmol, 1.2 equiv.) was added dropwise, at 0 °C, to a solution of triphenylphosphine (21.5 g, 81.9 mmol, 1.2 equiv.) in CH<sub>2</sub>Cl<sub>2</sub> (400 mL). Glutaconaldehyde **23** (9.08 g, 66.7 mmol, 1.0 equiv.) was added and the solution was stirred for 4 h at ambient temperature before it was filtered through a pad of silica. The crude product was purified by column chromatography on silica (hexanes/Et<sub>2</sub>O 9:1) to afford a mixture of the *E,E*- and the *Z,E*-isomer (3:1). The mixture was dissolved in Et<sub>2</sub>O (125 mL), TsOH (600 mg) was added and the solution was stirred for 5 min before being concentrated *in vacuo*. The slurry was dissolved in Et<sub>2</sub>O (30 mL), filtered through a pad of silica and concentrated *in vacuo* to afford the title compound **24** as essentially a single isomer. All spectroscopic and physical data were in agreement with those reported in the literature.<sup>4</sup> Yield: 8.1 g (75%); <sup>1</sup>H NMR (300 MHz, CDCl<sub>3</sub>) δ 9.58 (d, *J* = 7.8 Hz, 1H), 7.07 – 6.90 (m, 3H), 6.24 – 6.11 (m, 1H); <sup>13</sup>C NMR (75 MHz, CDCl<sub>3</sub>) δ 193.3, 147.9, 135.7, 132.0, 120.0. TLC (hexanes/Et<sub>2</sub>O 9:1, KMnO<sub>4</sub> stain): *R*<sub>f</sub> = 0.10.

**(R,4E,6E)-7-Bromo-3-hydroxy-1-((S)-4-isopropyl-2-thioxothiazolidin-3-yl)hepta-4,6-dien-1-one (25).**

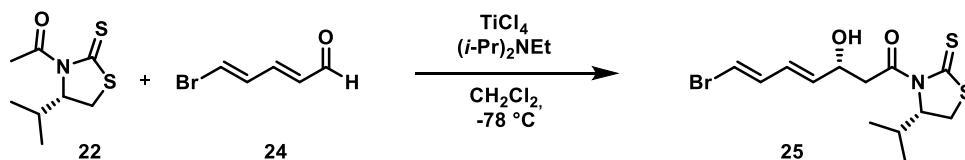

The (*R*)-aldol product **25** was prepared in 92% yield from dienal **24** and the auxiliary **22** according to the procedure of Olivo and coworkers.<sup>5</sup> To a solution of *N*-acetylthiazolidinethione **22** (5.00 g, 24.6 mmol, 1.0 equiv.) in CH<sub>2</sub>Cl<sub>2</sub> (245 mL), TiCl<sub>4</sub> (1M in CH<sub>2</sub>Cl<sub>2</sub> 4.66 g, 24.6 mmol, 1.0 equiv.) was added at -78 °C and stirred for 5 min. Diisopropylethylamine (3.81 g, 29.5 mmol, 1.2 equiv.) in CH<sub>2</sub>Cl<sub>2</sub> (61 mL) was added and the solution was stirred for 30 min at -78 °C, whereupon the freshly prepared aldehyde **24** (3.56 g, 22.1 mmol, 0.9 equiv.) in CH<sub>2</sub>Cl<sub>2</sub> (61 mL) was added dropwise. The mixture was stirred for 1 h at -78 °C, then quenched with half saturated ammonium chloride (100 ml) and warmed to room temperature. The layers were separated and the aq. layer was extracted with CH<sub>2</sub>Cl<sub>2</sub> (2 x 80 mL). The combined organic layers were dried (Na<sub>2</sub>SO<sub>4</sub>) and filtered, before concentrated *in vacuo*. The crude product was purified by column chromatography on silica (hexanes/EtOAc 7:3) to afford the title compound **25** as a yellow oil. All spectroscopic and physical data were in full agreement with those reported in the literature.<sup>5</sup> Yield: 9.0 g (92%).  $[\alpha]_D^{20} +271$  (c 0.13, CHCl<sub>3</sub>); <sup>1</sup>H NMR (300 MHz, CHCl<sub>3</sub>) δ 6.72 (dd, *J* = 13.5, 10.8 Hz, 1H), 6.35 (d, *J* = 13.6 Hz, 1H), 6.26 (ddd, *J* = 15.3, 10.8, 1.5 Hz, 1H), 5.79 (dd, *J* = 15.3, 5.4 Hz, 1H), 5.16 (dd, *J* = 7.8, 6.4 Hz, 1H), 4.76 – 4.65 (m, 1H), 3.70 (dd, *J* = 17.6, 3.1 Hz, 1H), 3.53 (dd, *J* = 11.5, 7.9 Hz, 1H), 3.29 (dd, *J* = 17.6, 8.6 Hz, 1H), 3.04 (dd, *J* = 11.6, 1.1 Hz, 1H), 2.93 (d, *J* = 4.5 Hz, 1H), 2.36 (dq, *J* = 13.6, 6.8 Hz, 1H), 1.07 (d, *J* = 6.7 Hz, 3H), 0.99 (d, *J* = 6.9 Hz, 3H). <sup>13</sup>C NMR (101 MHz, CDCl<sub>3</sub>) δ 203.1, 172.3, 136.7, 134.8, 128.0, 109.6, 71.5, 68.1, 45.1, 31.0, 30.8, 19.2, 18.0. <sup>5</sup> The diastereomeric ratio (15.3:1) on the crude product was determined by HPLC analysis (Eclipse XDB-C18, MeOH/H<sub>2</sub>O 70:30, 1.0 mL/min, *t*<sub>r</sub>(minor) = 8.65 min and *t*<sub>r</sub>(major) = 10.85 min).

**(*R*,4*E*,6*E*)-7-Bromo-3-((*tert*-butyldimethylsilyloxy)-1-((*S*)-4-isopropyl-2-thioxothiazolidin-3-yl)hepta-4,6-dien-1-one (26).**

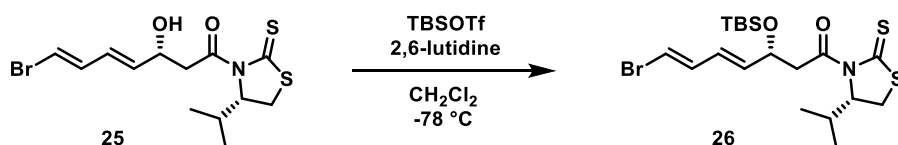

According to the procedure of Corey and coworkers,<sup>6</sup> the alcohol **25** was protected with a TBS-group. 2,6-Lutidine (2.91 g, 27.2 mmol, 3.0 equiv.) and TBSOTf (3.11 g, 11.8 mmol, 1.3 equiv.) were added to a solution of alcohol **25** (3.30 g, 9.1 mmol, 1.0 equiv.) in CH<sub>2</sub>Cl<sub>2</sub> (90 mL) at -78 °C. The reaction was stirred at that temperature for 3 h before it was quenched with saturated aq. NH<sub>4</sub>Cl (45 mL). The layers were separated and the aqueous layer was extracted with CH<sub>2</sub>Cl<sub>2</sub> (3 x 40 mL). The combined organic layers were dried (Na<sub>2</sub>SO<sub>4</sub>), before concentrated *in vacuo*. The crude product was purified by column chromatography on silica (hexanes/EtOAc 98:2) to afford the title compound **26** as a yellow oil. All spectroscopic and physical data were in full agreement with those reported in the literature.<sup>5</sup> Yield: 4.2 g (97%);  $[\alpha]_D^{20} +263$  (c 0.5, CHCl<sub>3</sub>); <sup>1</sup>H NMR (300 MHz, CDCl<sub>3</sub>) δ 6.69 (dd, *J* = 13.4, 10.7 Hz, 1H), 6.31 (d, *J* = 13.5 Hz, 1H), 6.15 (dd, *J* = 15.5, 11.1 Hz, 1H), 5.79 (dd, *J* = 14.9, 6.6 Hz, 1H), 5.04 (t, *J* = 7.0 Hz, 1H), 4.75 (q, *J* = 6.4 Hz, 1H), 3.64 (dd, *J* = 16.6, 7.8 Hz, 1H), 3.47 (dd, *J* = 10.9, 7.9 Hz, 1H), 3.21 (dd, *J* = 16.4, 4.6 Hz, 1H), 3.03 (d, *J* = 11.6 Hz, 1H), 2.48 – 2.26 (m, 1H), 1.06 (d, *J* = 7.2 Hz, 3H), 0.97 (d, *J* = 7.1 Hz, 3H), 0.86 (s, 9H), 0.05 (s, 3H), 0.03 (s, 3H); <sup>13</sup>C NMR (75 MHz, CDCl<sub>3</sub>) δ 202.9, 170.9, 136.8, 127.4, 109.1, 71.8, 69.8, 46.2, 31.0, 30.9, 25.9 (3C), 19.3, 18.2, 17.9, -4.2, -4.8. TLC (hexanes/EtOAc 95:5, KMnO<sub>4</sub> stain): *R*<sub>f</sub> = 0.30.

**(*R*,4*E*,6*E*)-7-Bromo-3-((*tert*-butyldimethylsilyloxy)hepta-4,6-dienal (12).**

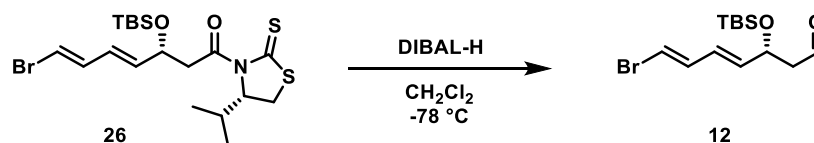

Aldehyde **12** was prepared by a DIBAL-H reduction of the protected thiazolidinethione **26** according to the procedure of Olivo *et al.*<sup>7</sup> DIBAL-H (1.25 mL, 1M in hexanes, 1.2 equiv.) was added to a stirred solution of

thiazolidinethione **26** (500 mg, 1.04 mmol, 1.0 equiv.) in CH<sub>2</sub>Cl<sub>2</sub> (20 mL) at -78 °C. The mixture was stirred for 3 h and then quenched with sat. aq. NaHCO<sub>3</sub> (10 mL). The cooling bath was removed and solid Na-K tartrate (~ 0.7 g) was added and stirring was continued for another 40 min. Et<sub>2</sub>O (35 mL) was added. The layers were separated and the aq. layer was extracted with Et<sub>2</sub>O (3 x 30 mL). The combined organic layers were dried (Na<sub>2</sub>SO<sub>4</sub>), before concentrated *in vacuo*. The crude product was purified by column chromatography on silica (hexanes/EtOAc 95:5) to afford the title compound **12** as a yellow oil. All spectroscopic and physical data were in full agreement with those reported in the literature.<sup>7</sup> [ $\alpha$ ]<sub>D</sub><sup>20</sup> +31 (c 0.2, CHCl<sub>3</sub>); <sup>1</sup>H NMR (300 MHz, CDCl<sub>3</sub>)  $\delta$  9.75 (t, *J* = 2.2 Hz, 1H), 6.69 (dd, *J* = 13.4, 10.8 Hz, 1H), 6.33 (d, *J* = 13.6 Hz, 1H), 6.16 (ddd, *J* = 15.2, 10.6, 1.3 Hz, 1H), 5.75 (ddd, *J* = 15.3, 5.9, 0.8 Hz, 1H), 4.66 (dd, *J* = 6.8, 5.5 Hz, 1H), 2.75 – 2.41 (m, 2H), 0.87 (s, 9H), 0.06 (s, 3H), 0.04 (s, 3H); <sup>13</sup>C NMR (75 MHz, CDCl<sub>3</sub>)  $\delta$  201.2, 136.6, 136.1, 127.6, 109.6, 68.5, 51.4, 25.9, 14.3, -4.2, -4.9. TLC (heptane/EtOAc 9:1, CAM stain): *R*<sub>f</sub> = 0.22.

### Methyl 7-hydroxyheptanoate (**8**).

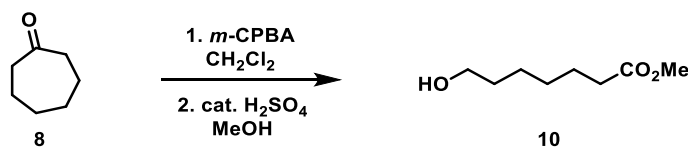

Utilizing a Baeyer-Villiger reaction followed by an esterification, alcohol ester **10** was prepared from commercially available cycloheptanone **8** according to the procedure of Watanabe and coworkers.<sup>8</sup> *m*-CPBA (25.00 g, 111.5 mmol, 1.5 equiv.) was dissolved in CH<sub>2</sub>Cl<sub>2</sub> (200 mL) and cooled to 0°C. Cycloheptanone **8** (8.30 g, 74.4 mmol, 1.0 equiv.) was then added, and the reaction mixture was stirred at ambient temperature for 5 days. The reaction mixture was cooled to 0 °C, filtered, the filtrate was washed with sat. aq. NaHCO<sub>3</sub> (50 mL), dried (Na<sub>2</sub>SO<sub>4</sub>) and concentrated *in vacuo*. The crude product was taken up in dry MeOH (150 mL) and added a few drops of conc. H<sub>2</sub>SO<sub>4</sub>. The reaction mixture was refluxed over night, cooled, added sat. aq. NaHCO<sub>3</sub> (15 mL) and concentrated *in vacuo*. More aq. NaHCO<sub>3</sub> (50 mL) was added to the mixture and the aq. phase was extracted with Et<sub>2</sub>O (4 x 100 mL). The organic phases were combined and dried (Na<sub>2</sub>SO<sub>4</sub>), filtered and concentrated *in vacuo*. The crude product was purified by column chromatography on silica (hexanes/EtOAc 4:1) to afford the title compound **10** as a clear oil. All spectroscopic and physical data were in full agreement with those reported in the literature.<sup>8</sup> Yield: 9.6 g (81%). <sup>1</sup>H NMR (300 MHz, CDCl<sub>3</sub>)  $\delta$  3.57 (s, 3H), 3.51 (t, *J* = 6.5 Hz, 2H), 2.58 (bs, 1H), 2.22 (t, *J* = 7.5 Hz, 2H), 1.61 – 1.41 (m, 4H), 1.34 – 1.25 (m, 4H); <sup>13</sup>C NMR (75 MHz, CDCl<sub>3</sub>)  $\delta$  174.3, 62.5, 51.5, 33.9, 32.4, 28.9, 25.4, 24.8. TLC (hexanes/EtOAc 4:1, KMnO<sub>4</sub> stain): *R*<sub>f</sub> = 0.10.

### Methyl 7-iodoheptanoate (**11**).

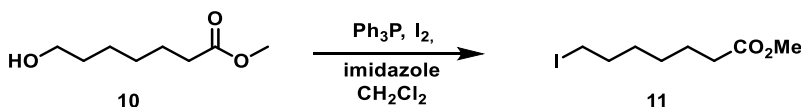

Iodide **11** was prepared from alcohol ester **10** according to the procedure reported by Mioskowski and coworkers.<sup>9</sup> To a solution of methyl ester **10** (3.10 g, 19.3 mmol) in dry CH<sub>2</sub>Cl<sub>2</sub> (200 mL), triphenylphosphine (7.75 g, 29.6 mmol) and imidazole (2.00 g, 29.8 mmol) were added. The reaction flask was placed in a cooling bath (ice, water, salt) for 15 min before iodide (7.60 g, 30.0 mmol) was added in one portion with rapid stirring. The reaction mixture was stirred for 15 min before the cooling bath was removed and the reaction mixture stirred at ambient temperature for another 35 min. A sat. solution of aq. Na<sub>2</sub>SO<sub>3</sub> (25 mL) was added, and the aq. phase was extracted with CH<sub>2</sub>Cl<sub>2</sub> (2 x 100 mL), dried (Na<sub>2</sub>SO<sub>4</sub>), filtrated and concentrated *in vacuo*. The crude product was purified by column chromatography on silica (hexanes/EtOAc 92:8) afford the title compound **11** as colourless oil. All spectroscopic and physical data were in full agreement with those reported in the literature.<sup>9</sup>

Yield: 4.4 g (85%).  $^1\text{H}$  NMR (400 MHz,  $\text{CDCl}_3$ )  $\delta$  3.66 (s, 3H), 3.18 (t,  $J = 7.0$  Hz, 2H), 2.31 (t,  $J = 7.5$  Hz, 2H), 1.82 (p,  $J = 7.0$  Hz, 2H), 1.63 (p,  $J = 7.6$  Hz, 2H), 1.46 – 1.29 (m, 4H);  $^{13}\text{C}$  NMR (101 MHz,  $\text{CDCl}_3$ )  $\delta$  174.0, 51.5, 33.9, 33.2, 30.1, 28.0, 24.7, 6.9.

**(7-Methoxy-7-oxoheptyl)triphenylphosphonium iodide (7).**

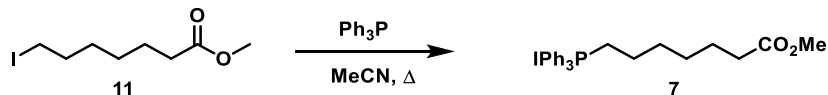

Iodide **11** (4.40 g, 16.29 mmol) was dissolved in dry MeCN (145 mL) and stirred under argon. Triphenylphosphine (10.90 g, 41.56 mmol) was added and the reaction mixture was heated to reflux for 12 h. The reaction mixture was concentrated *in vacuo*. The crude product was purified by column chromatography on silica ( $\text{CH}_2\text{Cl}_2/\text{MeOH}$  95:5) to afford the title compound **7** as a clear oil. Yield: 7.90 g (91%);  $^1\text{H}$  NMR (400 MHz,  $\text{CDCl}_3$ )  $\delta$  7.91 – 7.64 (m, 15H), 3.78 – 3.63 (m, 2H), 3.62 (s, 3H), 2.26 (t,  $J = 7.2$  Hz, 2H), 1.73 – 1.46 (m, 6H), 1.43 – 1.22 (m, 2H);  $^{13}\text{C}$  NMR (101 MHz, DMSO)  $\delta$  173.2, 134.9 (d,  $^4J_{\text{CP}} = 3.0$  Hz, 3C), 133.5 (d,  $^3J_{\text{CP}} = 10.1$  Hz, 6C), 130.2 (d,  $^2J_{\text{CP}} = 12.4$  Hz, 6C), 118.5 (d,  $^1J_{\text{CP}} = 85.7$  Hz, 3C), 51.17, 33.06, 29.4 (d,  $^2J_{\text{CP}} = 16.8$  Hz), 27.51, 24.02, 21.6 (d,  $^3J_{\text{CP}} = 4.3$  Hz), 20.1 (d,  $^1J_{\text{CP}} = 49.8$  Hz); HRESIMS  $m/z$  405.1975 [ $M\text{-I}$ ] $^+$  (calcd for  $\text{C}_{26}\text{H}_{30}\text{O}_2\text{P}$ , 405.1983). TLC ( $\text{CH}_2\text{Cl}_2/\text{MeOH}$  95:5,  $\text{KMnO}_4$  stain):  $R_f = 0.32$ .

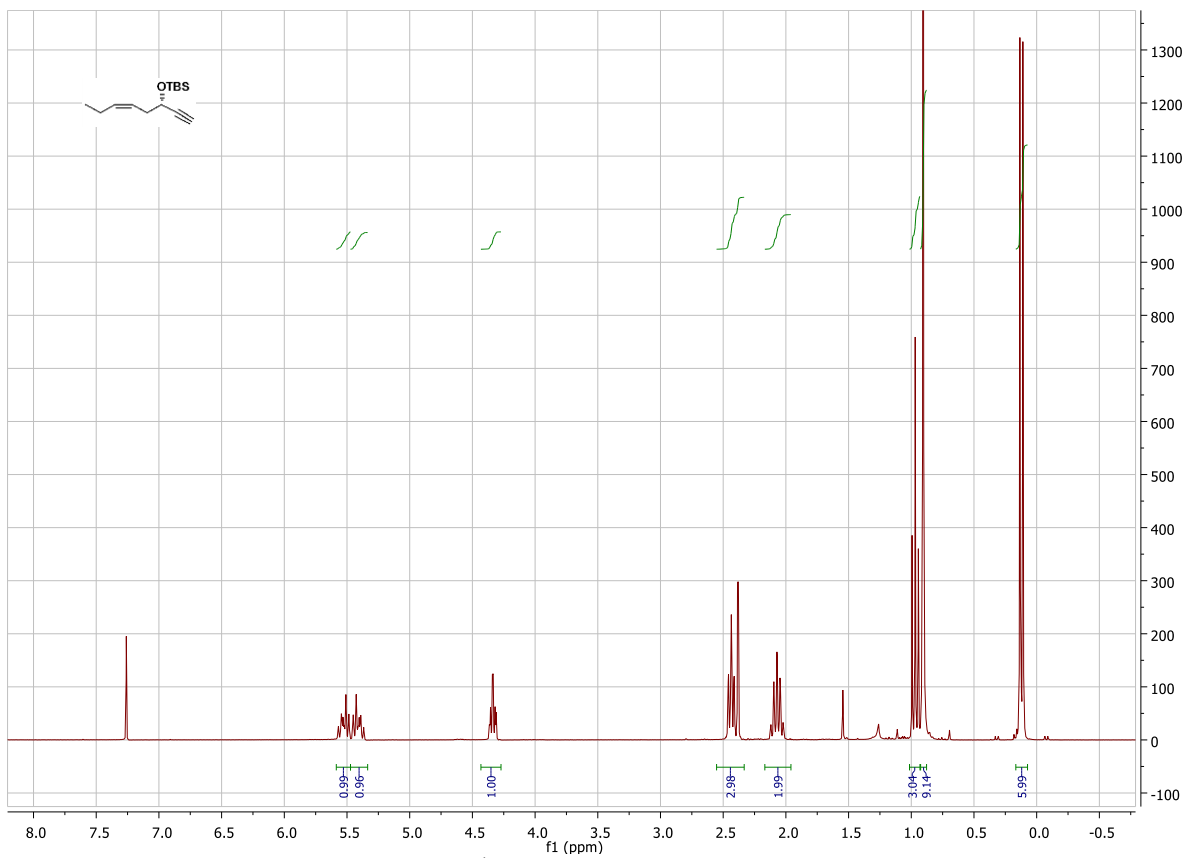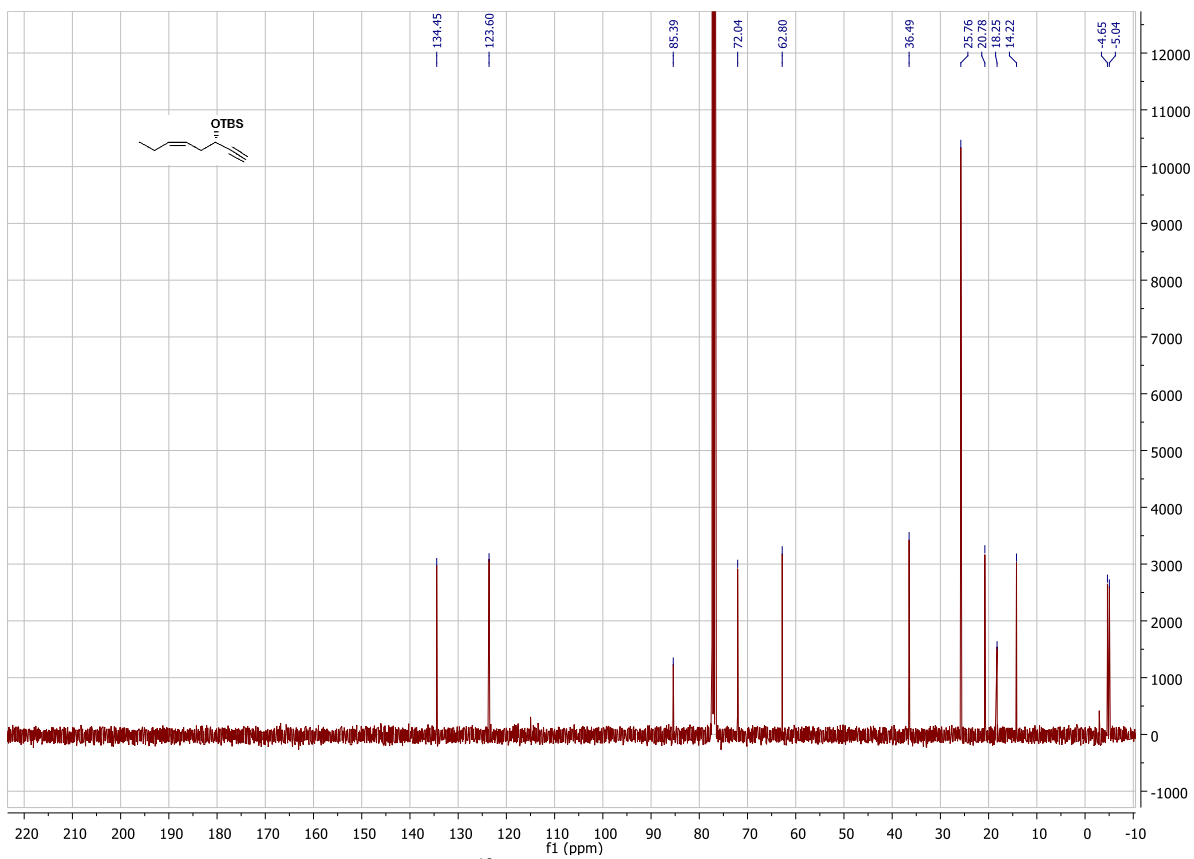

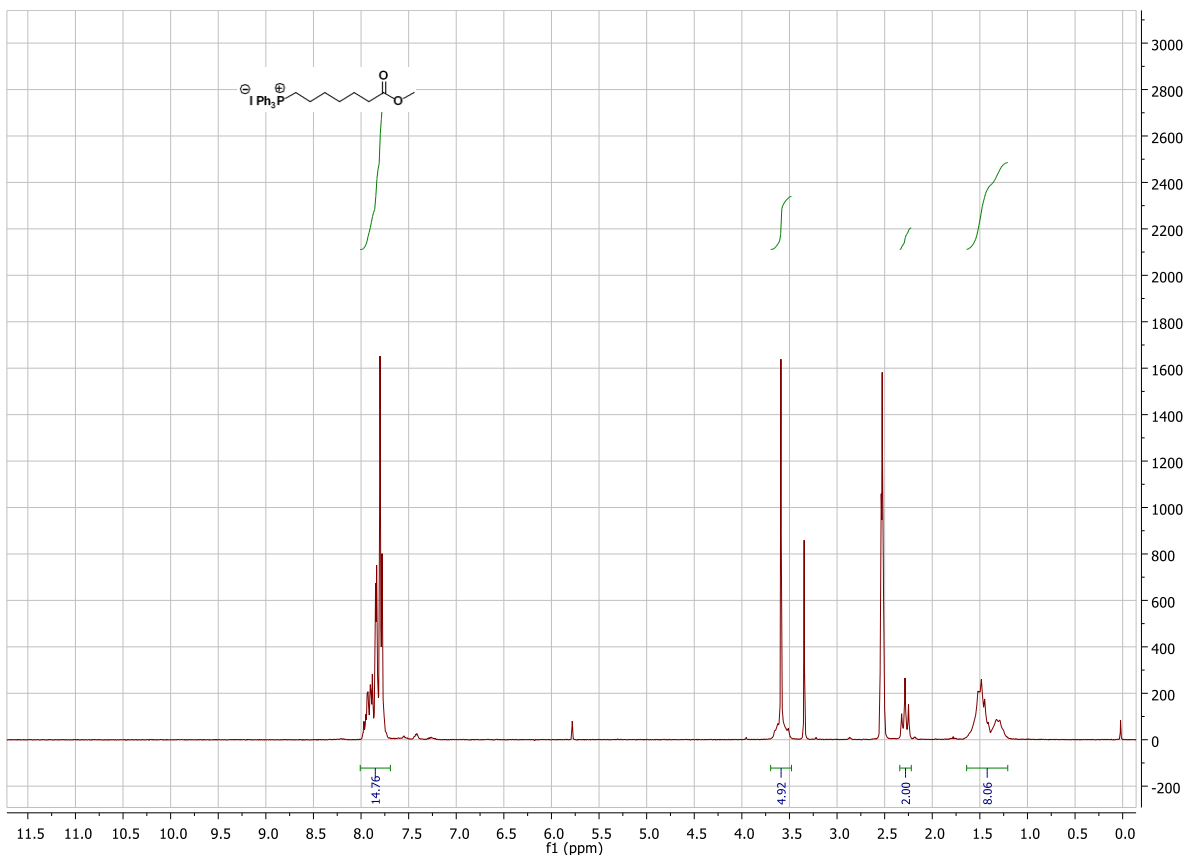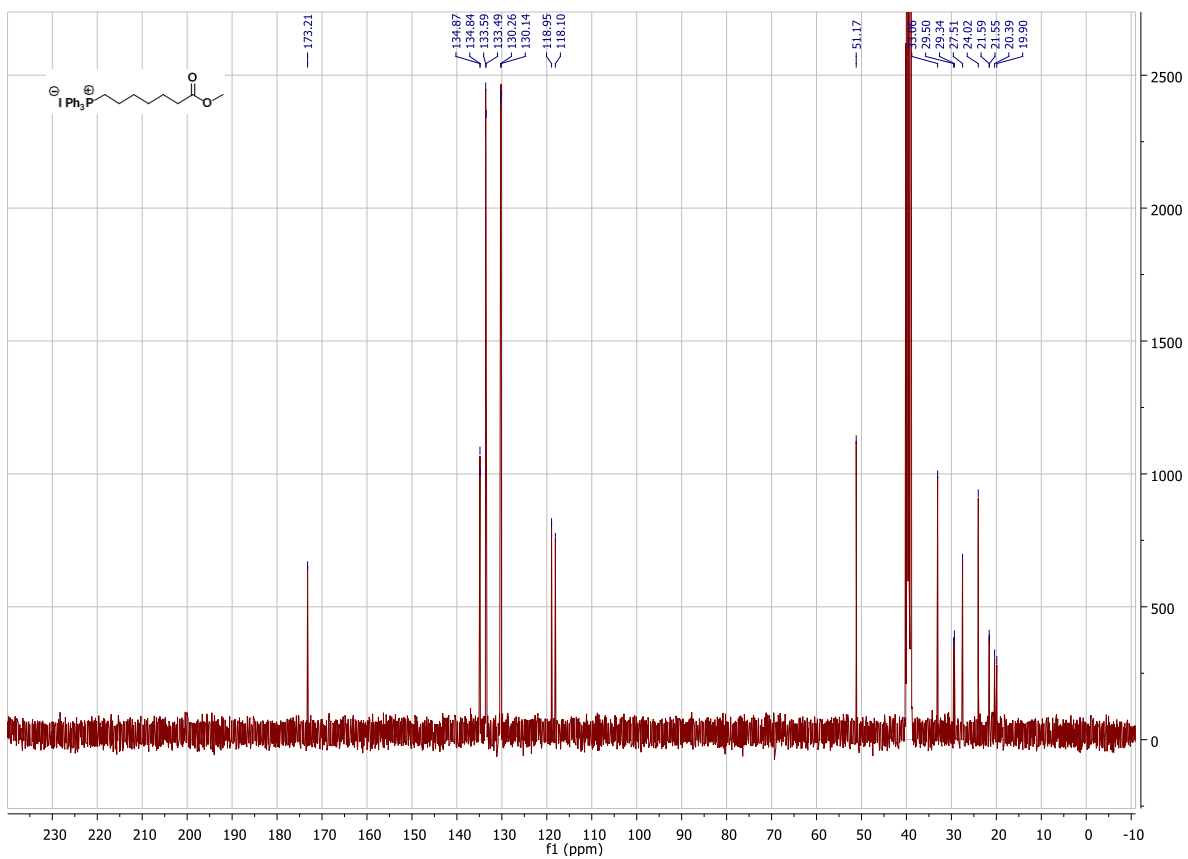



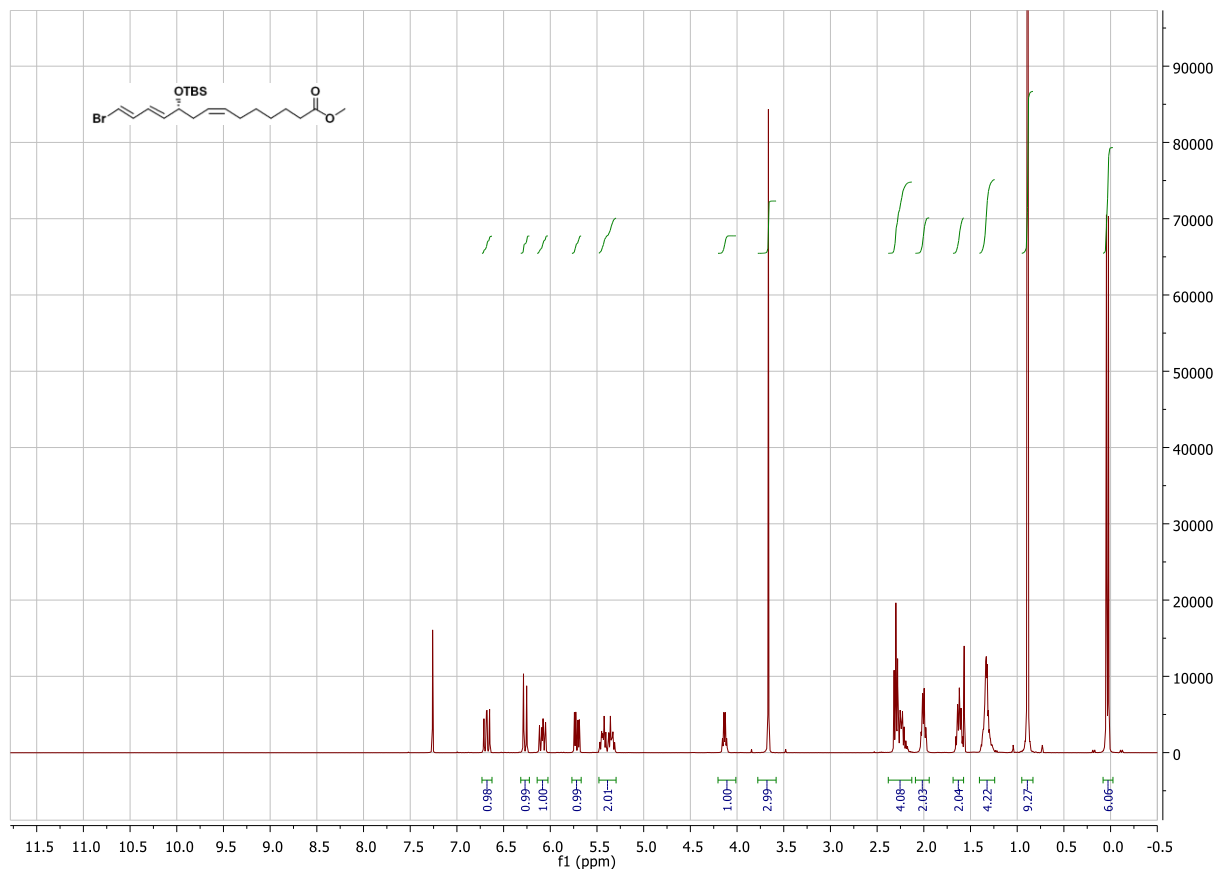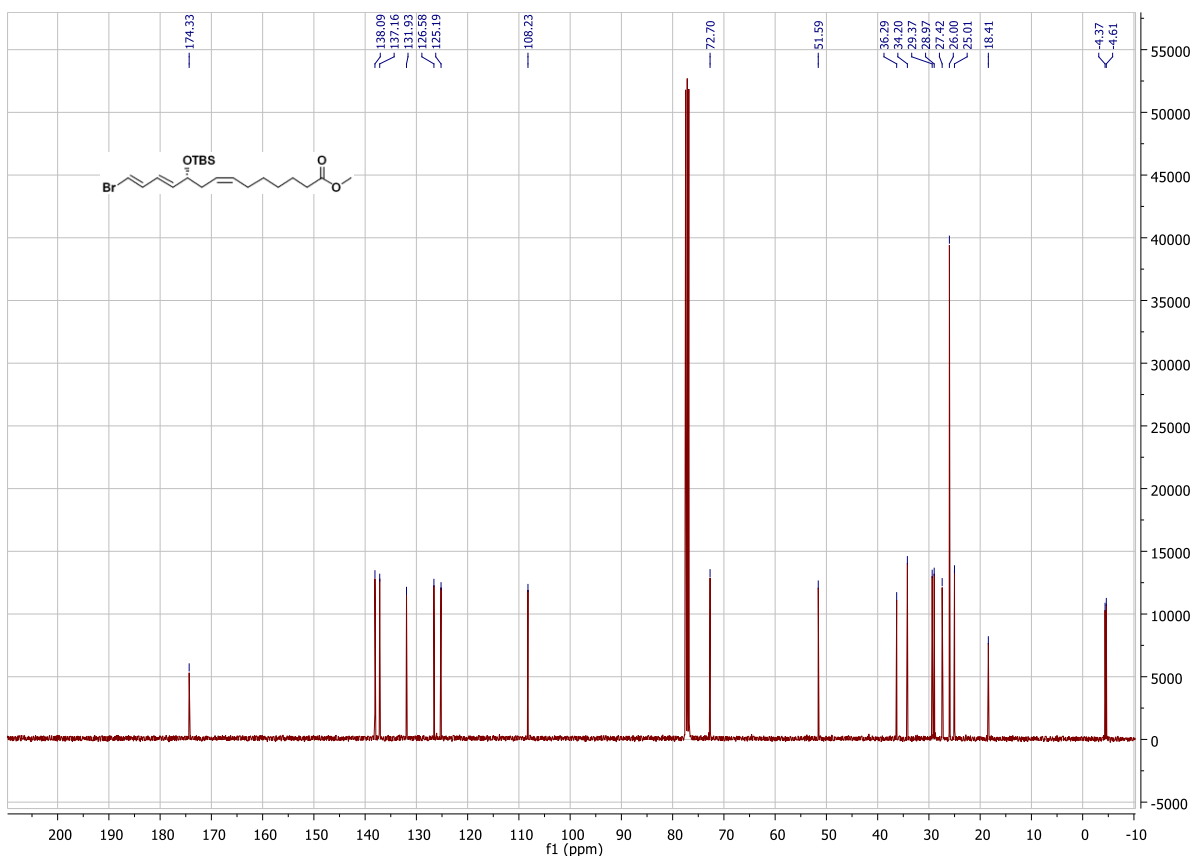

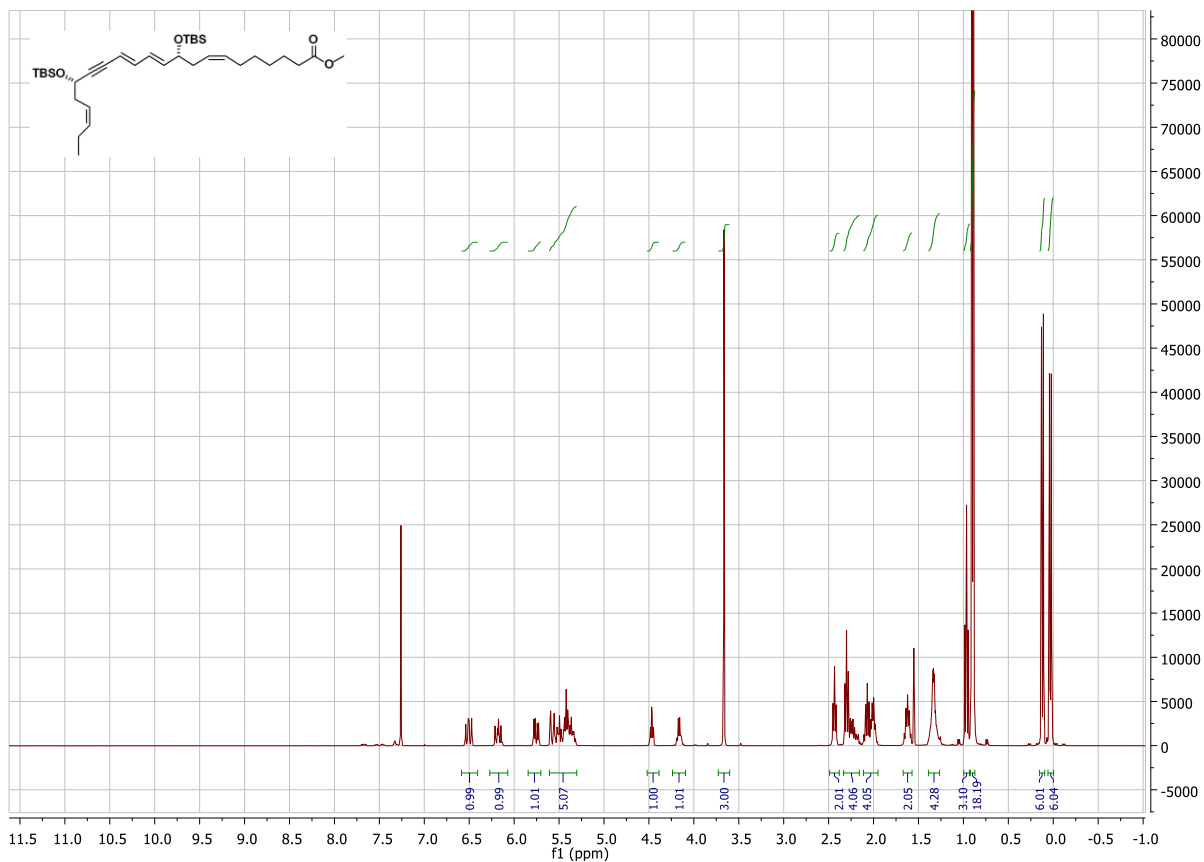

**Figure S-7**  $^1\text{H-NMR}$  spectrum of compound 18.

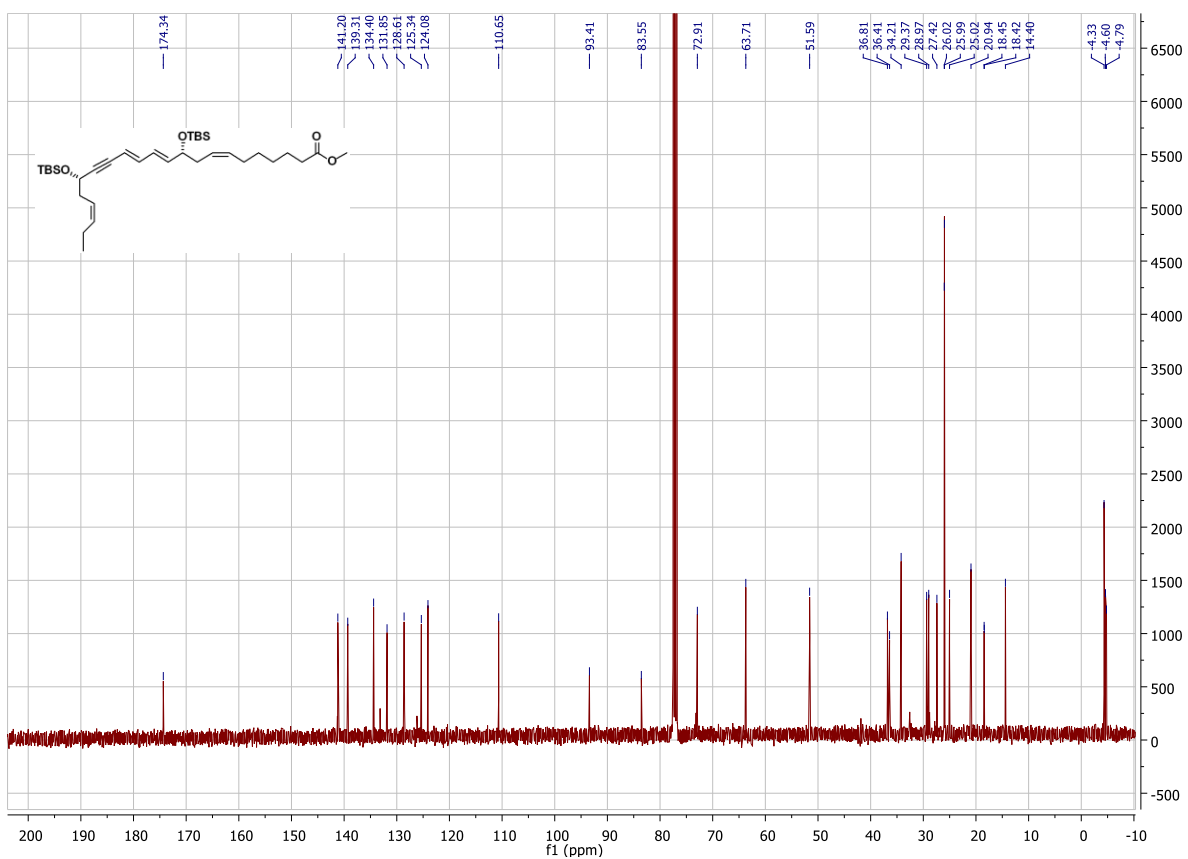

**Figure S-8**  $^{13}\text{C-NMR}$  spectrum of compound 18.

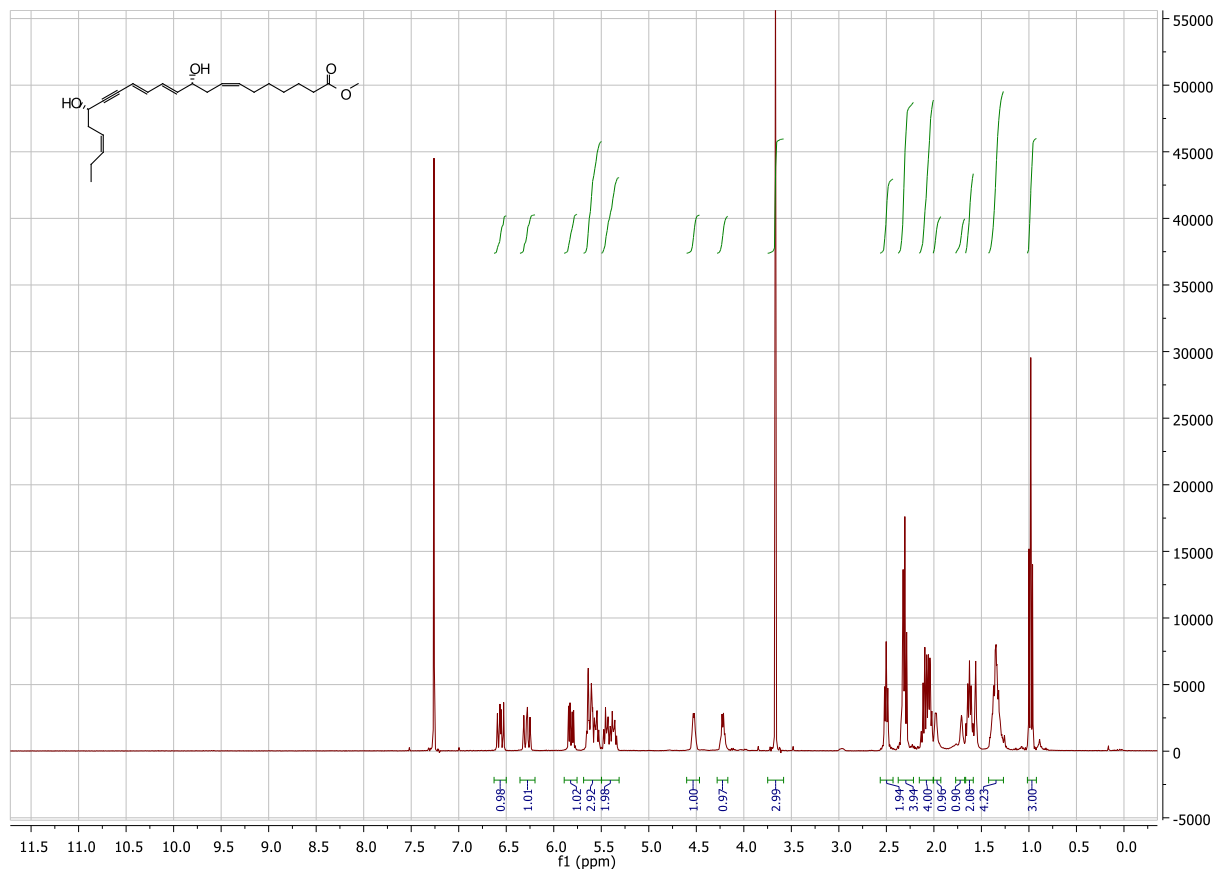

Figure S-9 <sup>1</sup>H-NMR spectrum of compound 19.

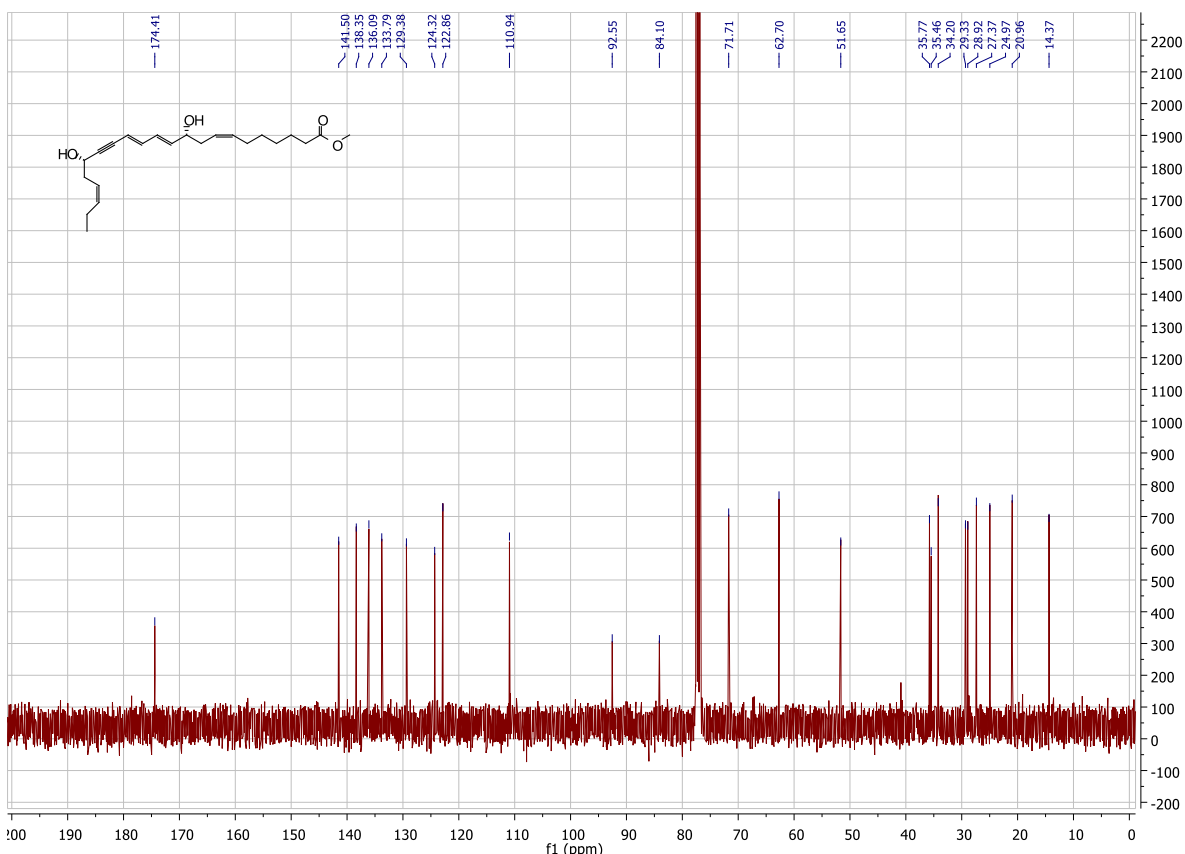

Figure S-10 <sup>13</sup>C-NMR spectrum of compound 19.

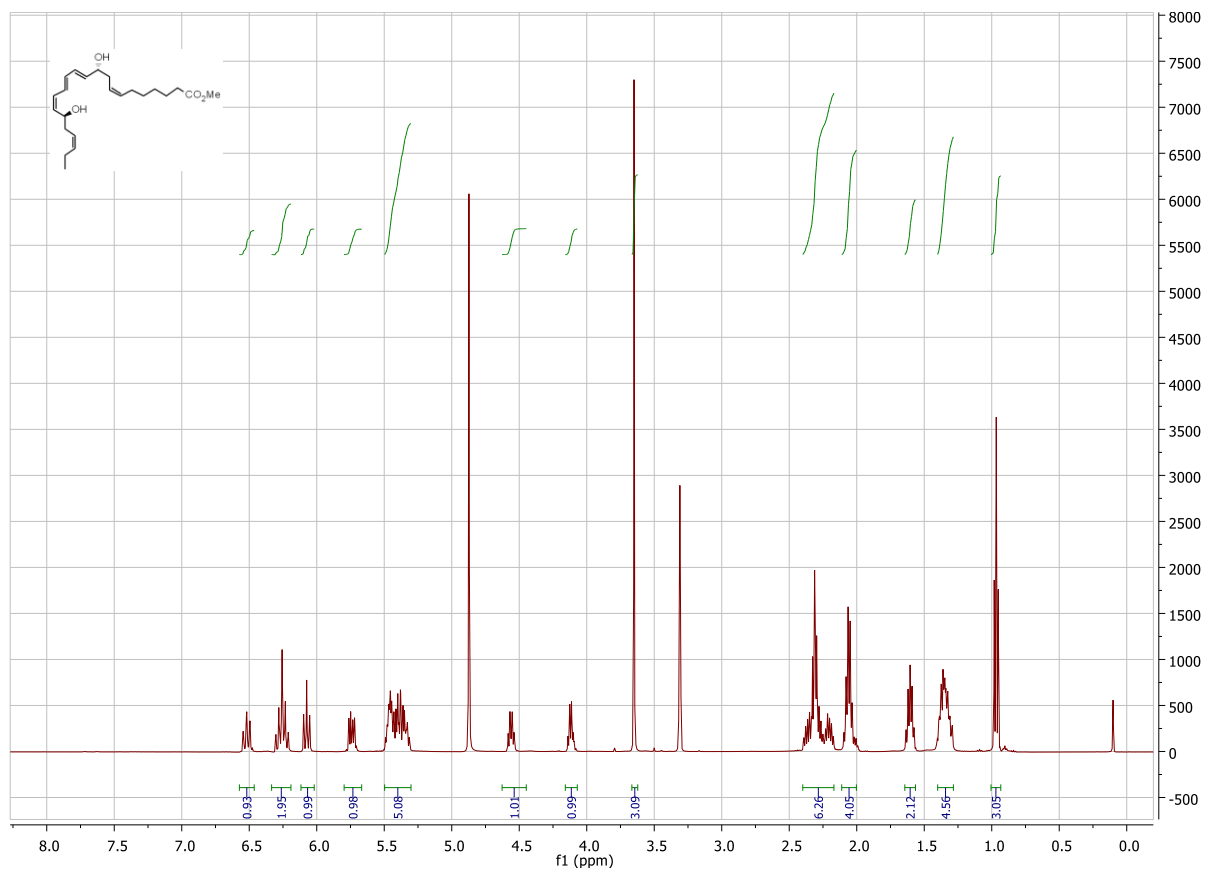

Figure S-11  $^1\text{H-NMR}$  spectrum of compound 6.

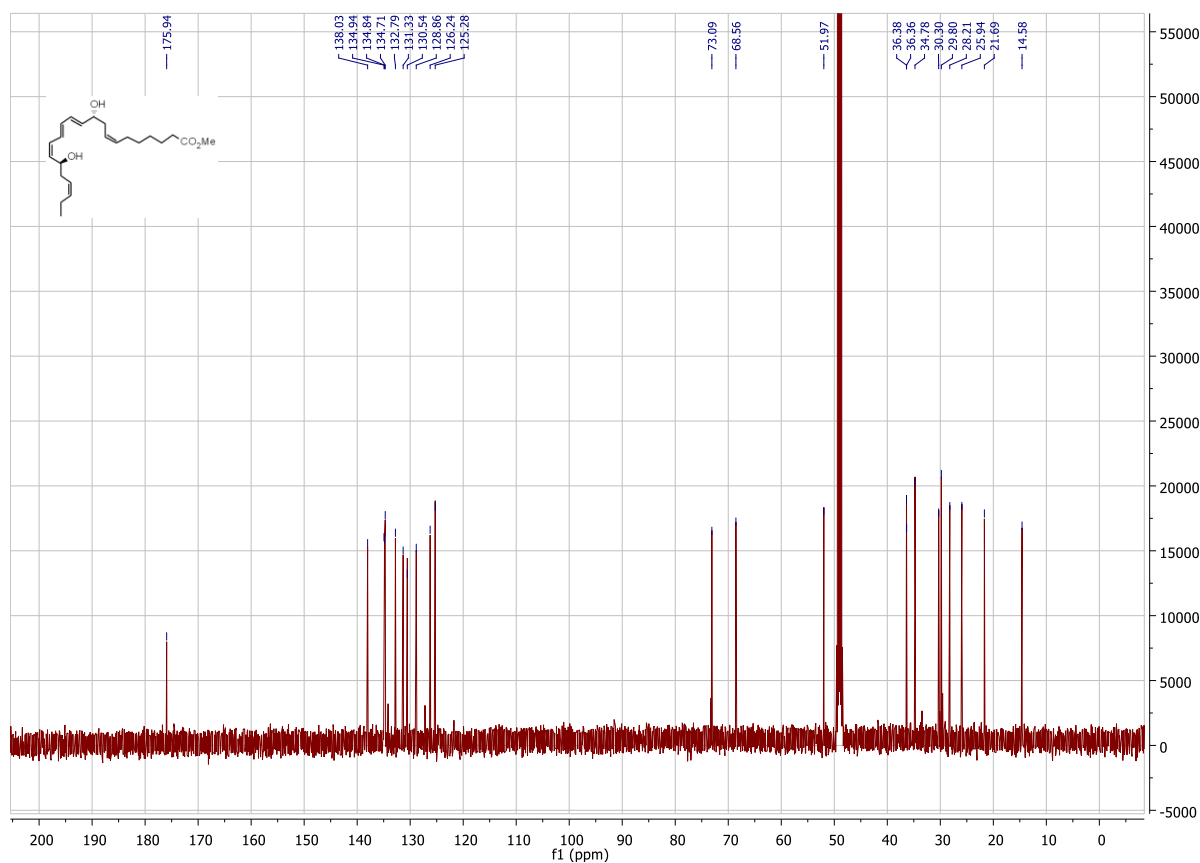

Figure S-12  $^{13}\text{C-NMR}$  spectrum of compound 6.

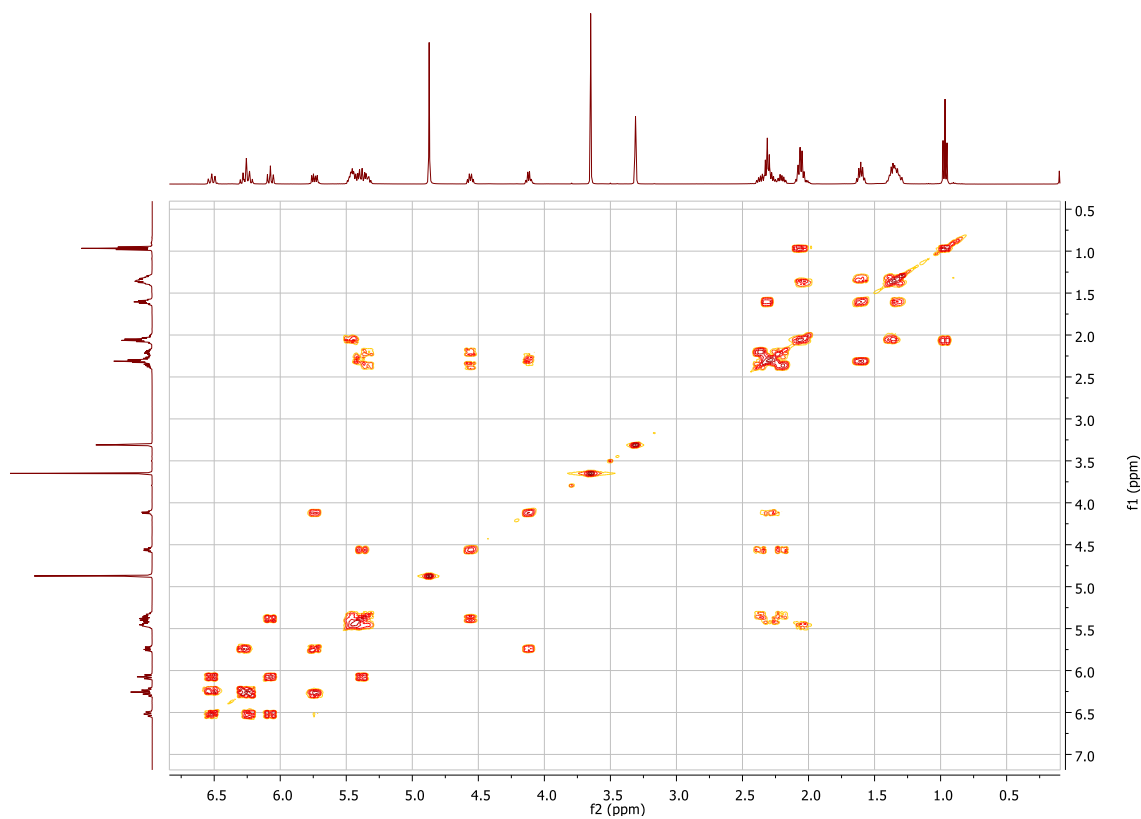

Figure S-13 COSYGP spectrum of compound **6**.

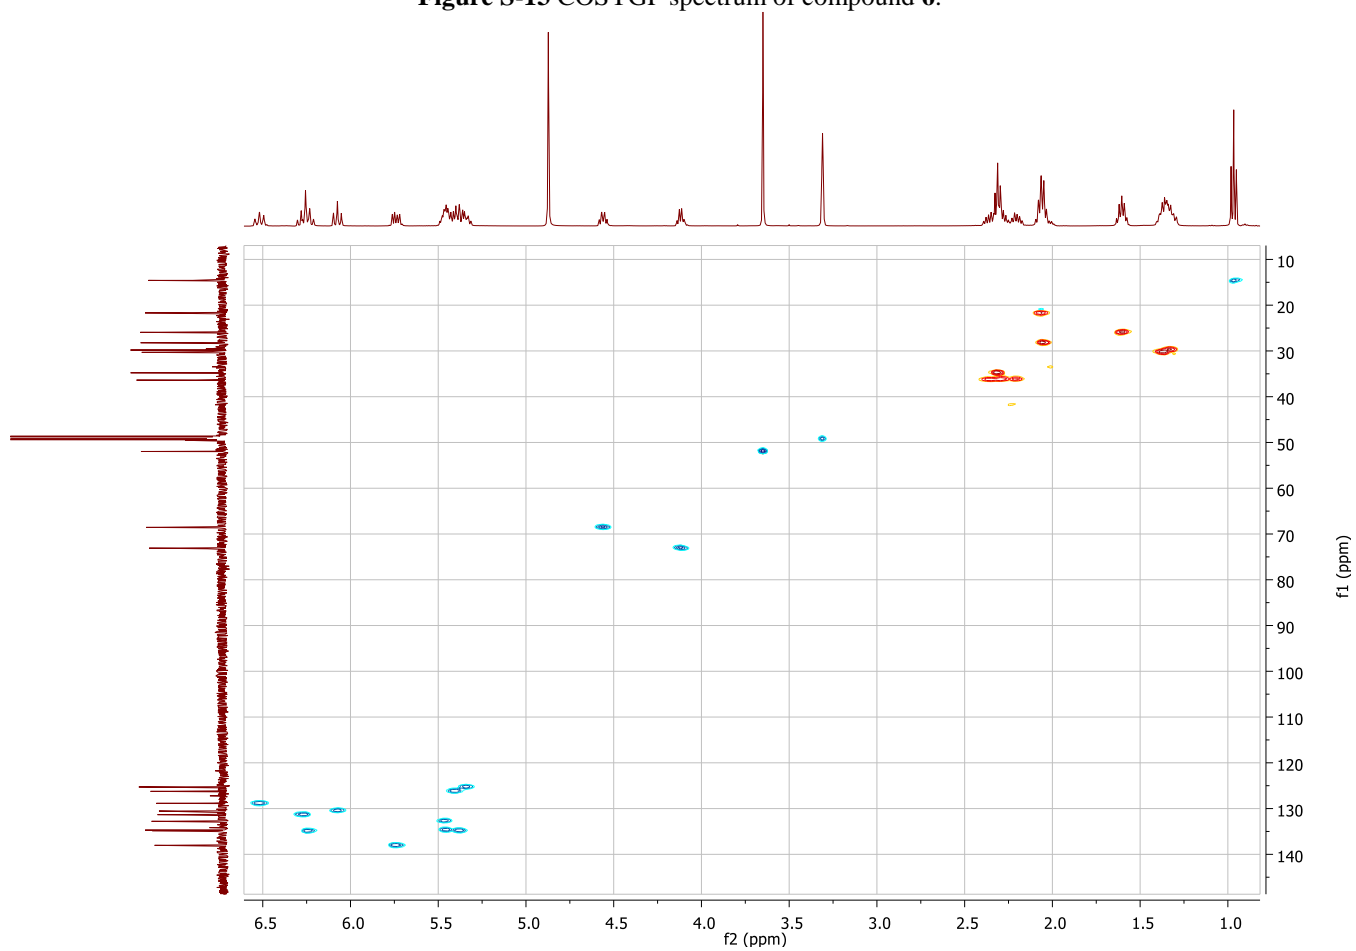

Figure S-14 HSQCETGP spectrum of compound **6**.

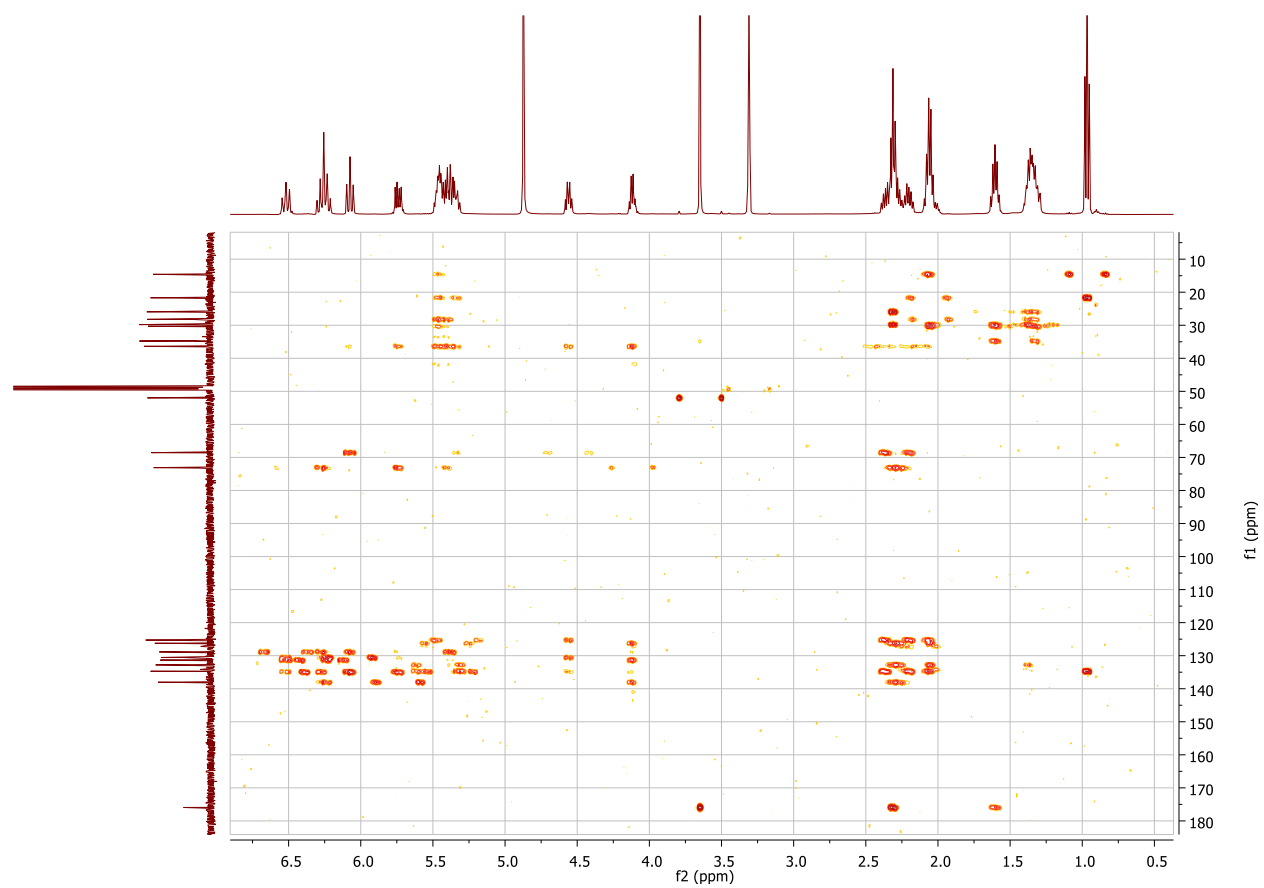

**Figure S-15** HMBCGPND spectrum of compound **6**.

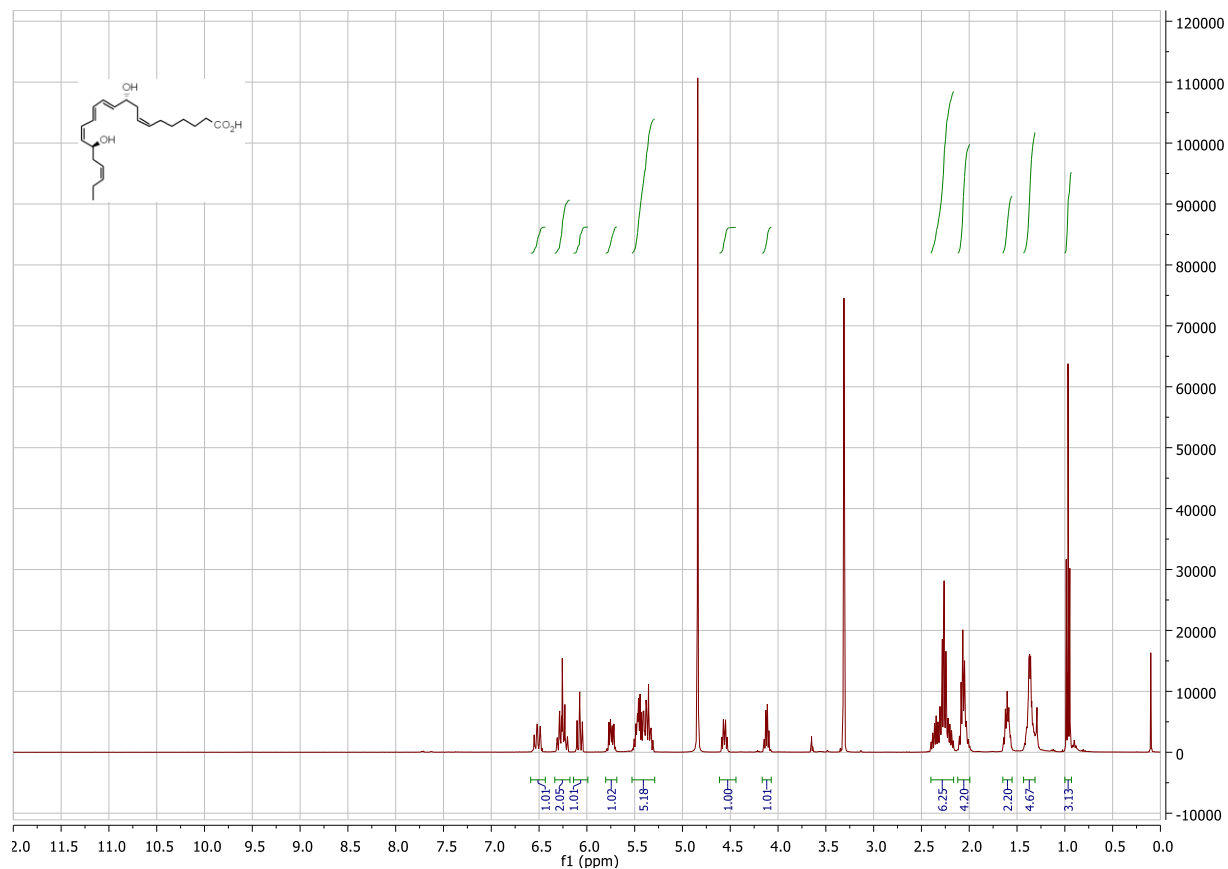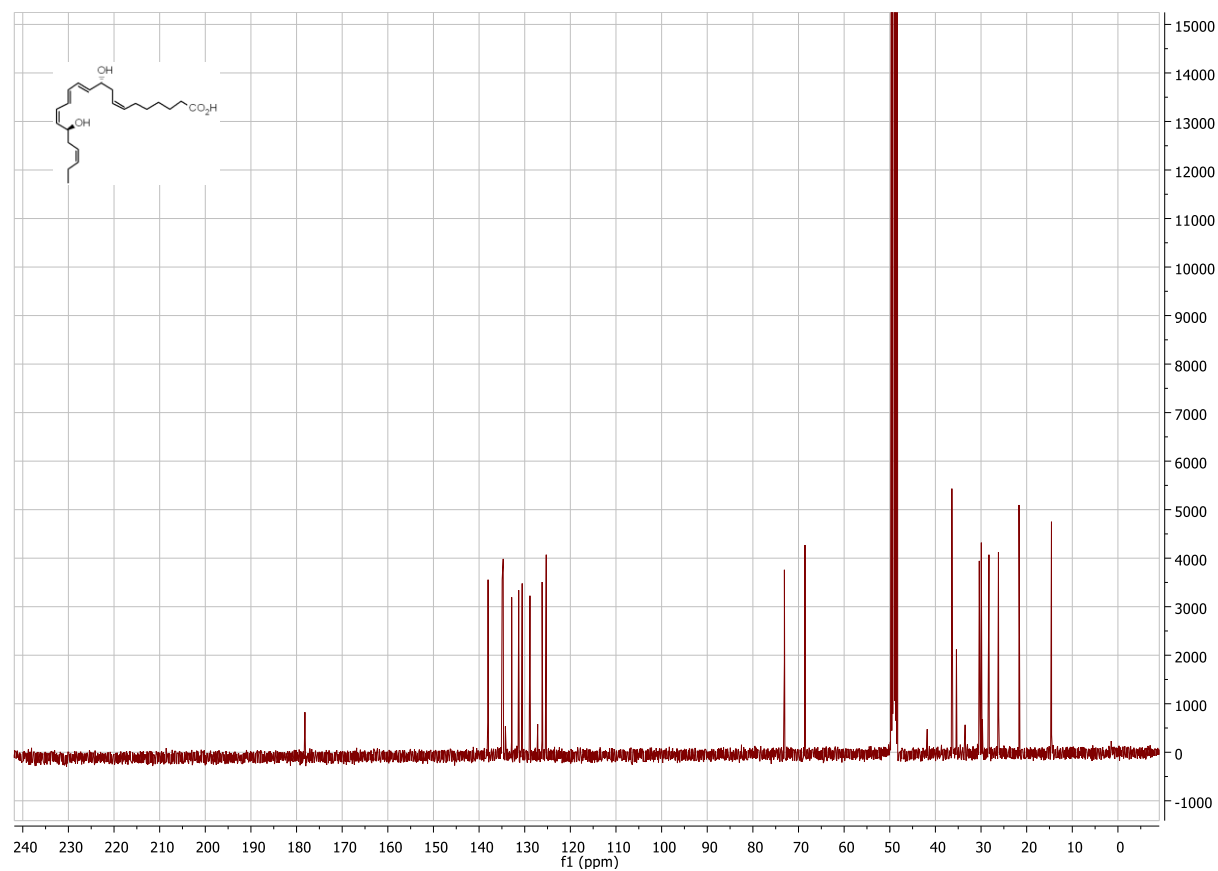

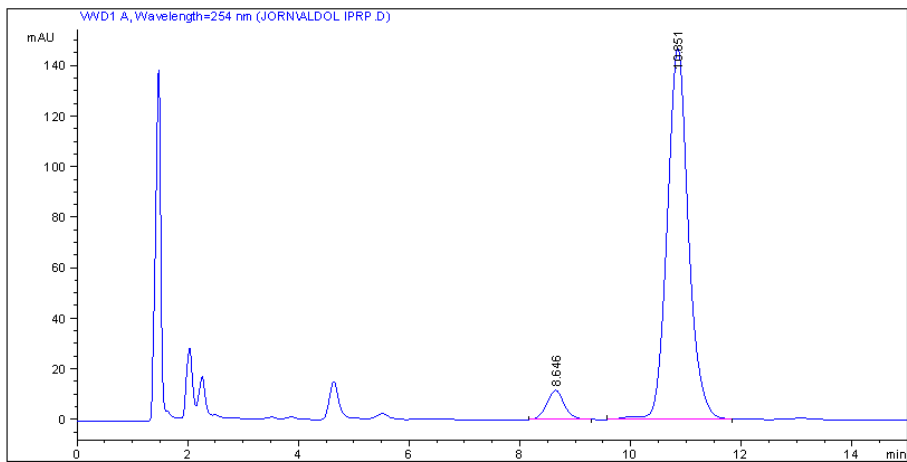

=====  
 Area Percent Report  
 =====

Sorted By : Signal  
 Multiplier : 1.0000  
 Dilution : 1.0000  
 Sample Amount : 1.00000 [ng/ul] (not used in calc.)  
 Use Multiplier & Dilution Factor with ISTDs

Signal 1: VWD1 A, Wavelength=254 nm

| Peak # | RetTime [min] | Type | Width [min] | Area mAU *s | Height [mAU] | Area %  |
|--------|---------------|------|-------------|-------------|--------------|---------|
| 1      | 8.646         | BB   | 0.3304      | 255.66954   | 11.57739     | 6.1309  |
| 2      | 10.851        | BB   | 0.4029      | 3914.47632  | 146.75571    | 93.8691 |

Totals : 4170.14586 158.33310

**Figure S-18 HPLC chromatogram of aldol product 25.**

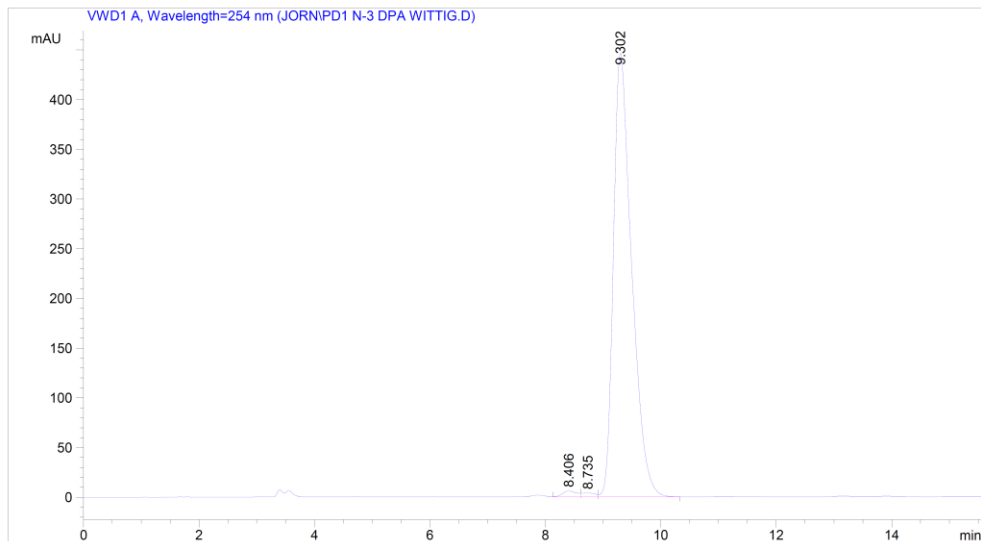

=====  
 Area Percent Report  
 =====

Sorted By : Signal  
 Multiplier : 1.0000  
 Dilution : 1.0000  
 Sample Amount : 1.00000 [ng/ul] (not used in calc.)  
 Use Multiplier & Dilution Factor with ISTDs

Signal 1: VWD1 A, Wavelength=254 nm

| Peak # | RetTime [min] | Type | Width [min] | Area mAU *s | Height [mAU] | Area %  |
|--------|---------------|------|-------------|-------------|--------------|---------|
| 1      | 8.406         | VV   | 0.2556      | 104.40636   | 6.03794      | 1.0492  |
| 2      | 8.735         | VV   | 0.2419      | 63.90968    | 3.93536      | 0.6423  |
| 3      | 9.302         | VB   | 0.3212      | 9782.51172  | 446.45831    | 98.3085 |

Totals : 9950.82775 456.43160

**Figure S-19 HPLC chromatogram of compound 14.**



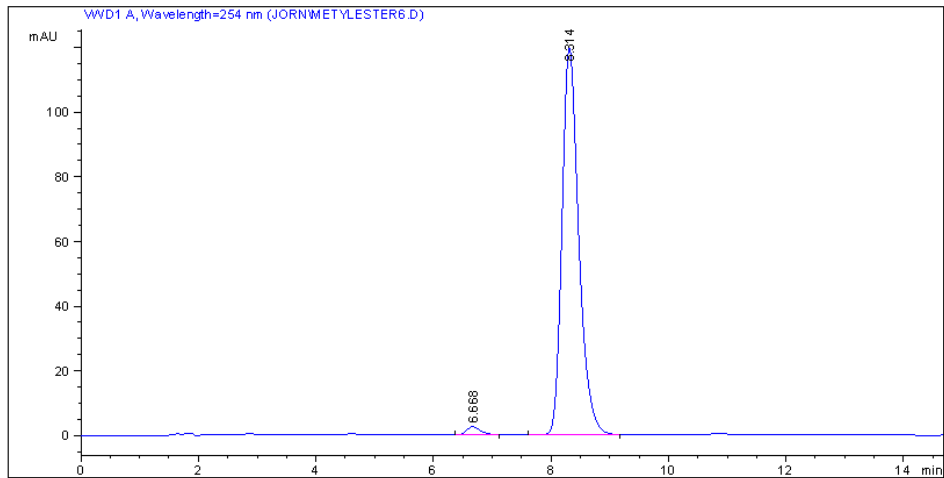

```

=====
                          Area Percent Report
=====
Sorted By      :      Signal
Multiplier     :      1.0000
Dilution      :      1.0000
Sample Amount  :      1.00000 [ng/ul] (not used in calc.)
Use Multiplier & Dilution Factor with ISTDs

Signal 1: VWD1 A, Wavelength=254 nm

Peak RetTime Type Width Area Height Area
# [min] [min] mAU *s [mAU ] %
-----|-----|-----|-----|-----|-----
1  6.668 BB  0.2502  42.36370  2.53597  1.7535
2  8.314 BB  0.3014 2373.62427 119.61662 98.2465

Totals :                          2415.98797 122.15259

```

**Figure S-20 HPLC chromatogram of methyl ester 6.**

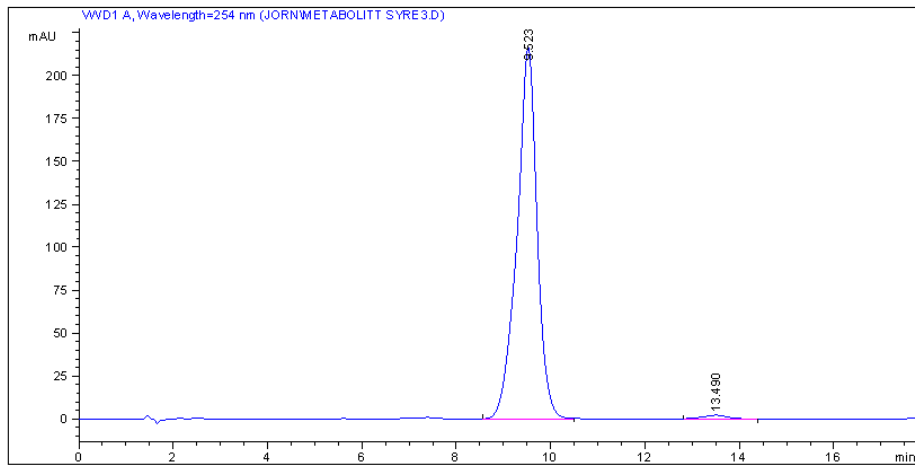

```

=====
                          Area Percent Report
=====
Sorted By      :      Signal
Multiplier     :      1.0000
Dilution      :      1.0000
Sample Amount  :      1.00000 [ng/ul] (not used in calc.)
Use Multiplier & Dilution Factor with ISTDs

Signal 1: VWD1 A, Wavelength=254 nm

Peak RetTime Type Width Area Height Area
# [min] [min] mAU *s [mAU ] %
-----|-----|-----|-----|-----|-----
1  9.523 BB  0.4282 6400.36182 216.30191 98.8673
2 13.490 BB  0.4940  73.32443  2.11902  1.1327

Totals :                          6473.68625 218.42093

```

**Figure S-21 HPLC chromatogram of PD1<sub>n-3</sub> DPA (5).**

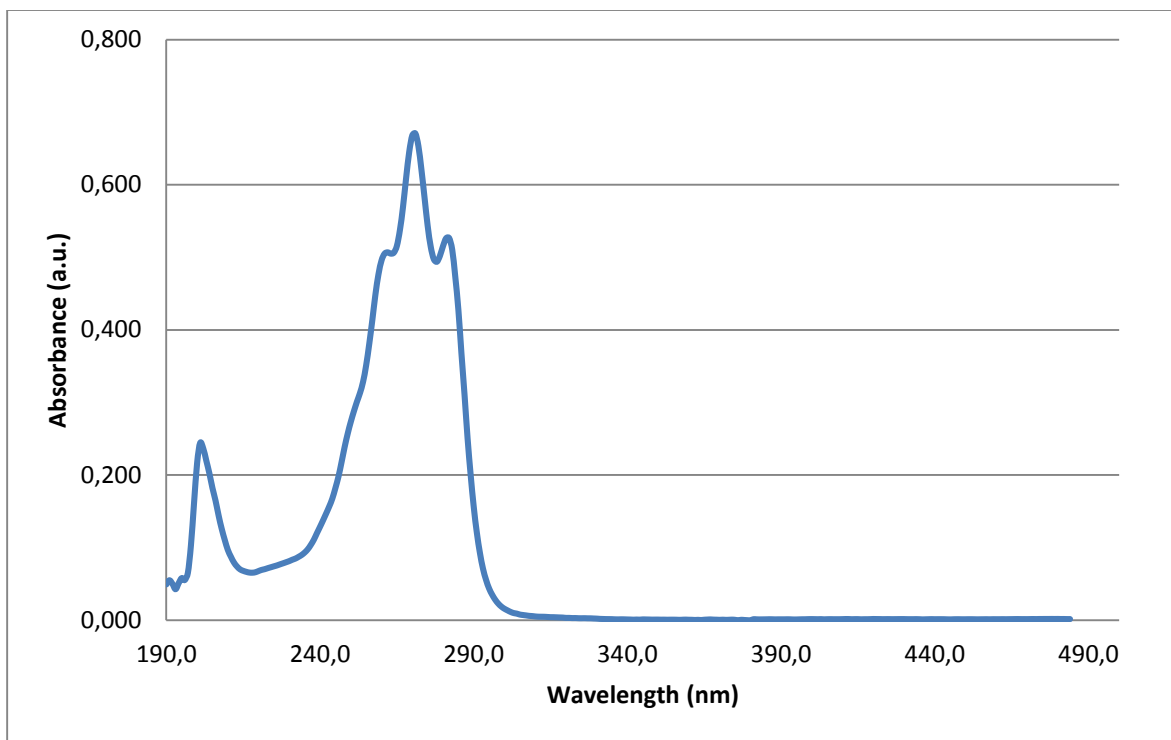

**Figure S-22** UV-Vis chromatogram of methyl ester **6**.

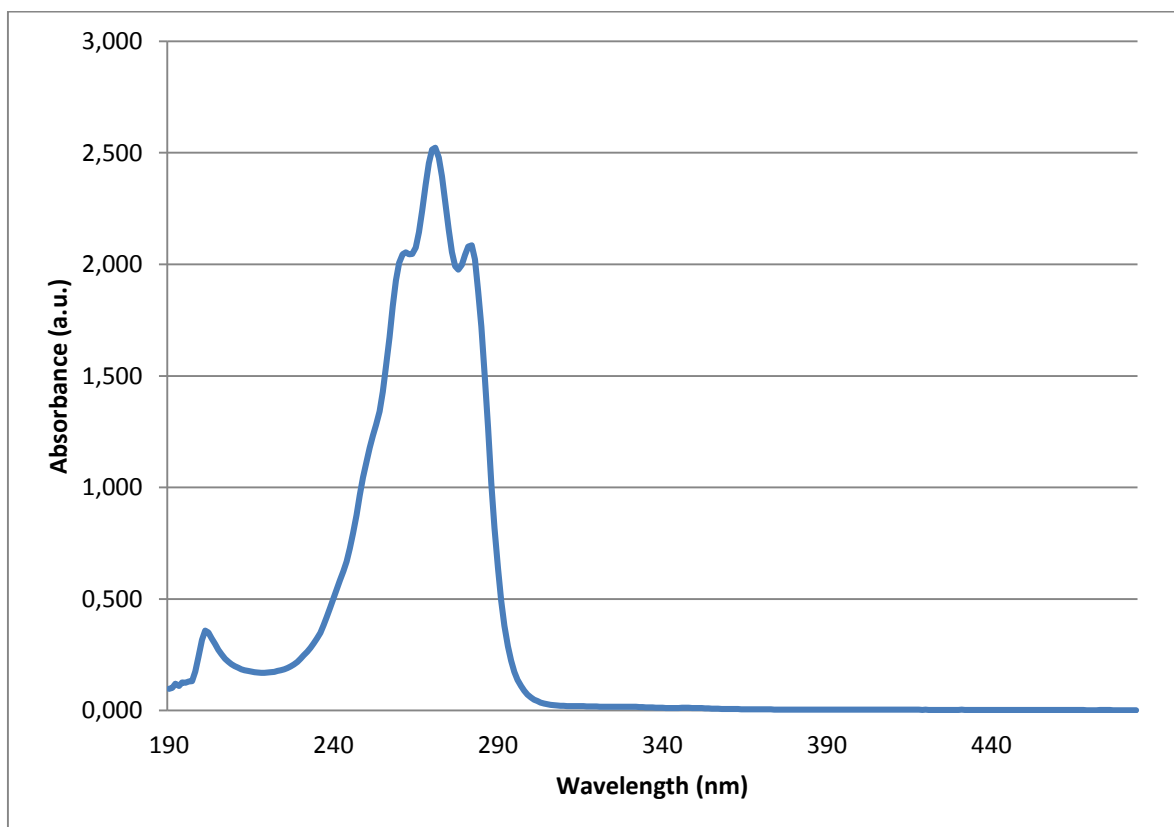

**Figure S-23** UV-Vis chromatogram of PD<sub>1n-3</sub>DPA (**5**).

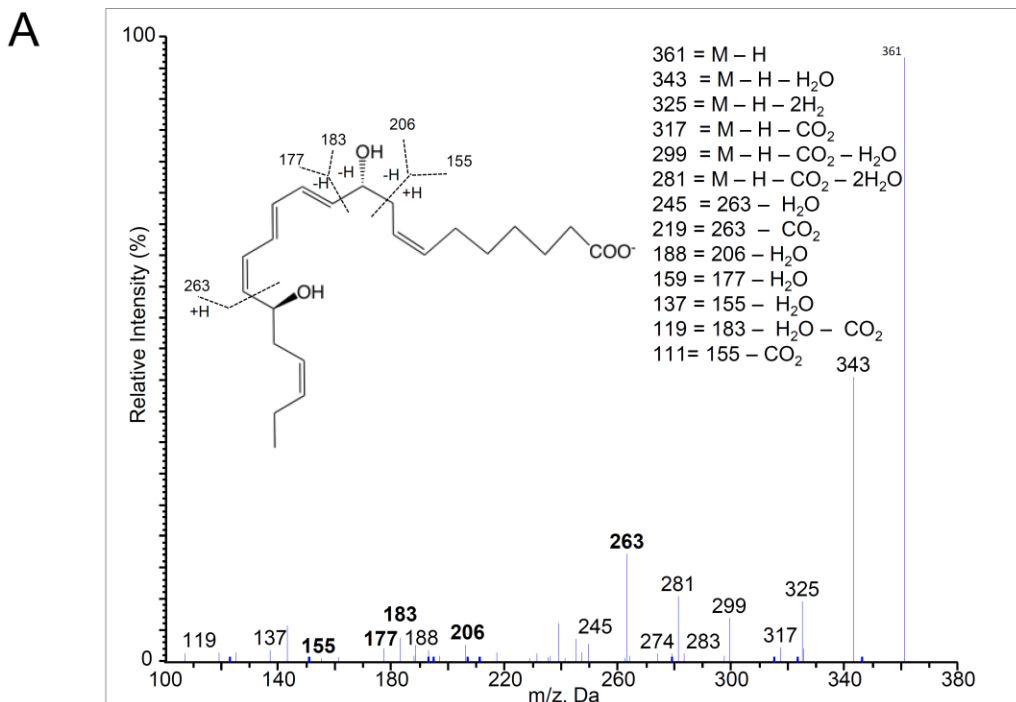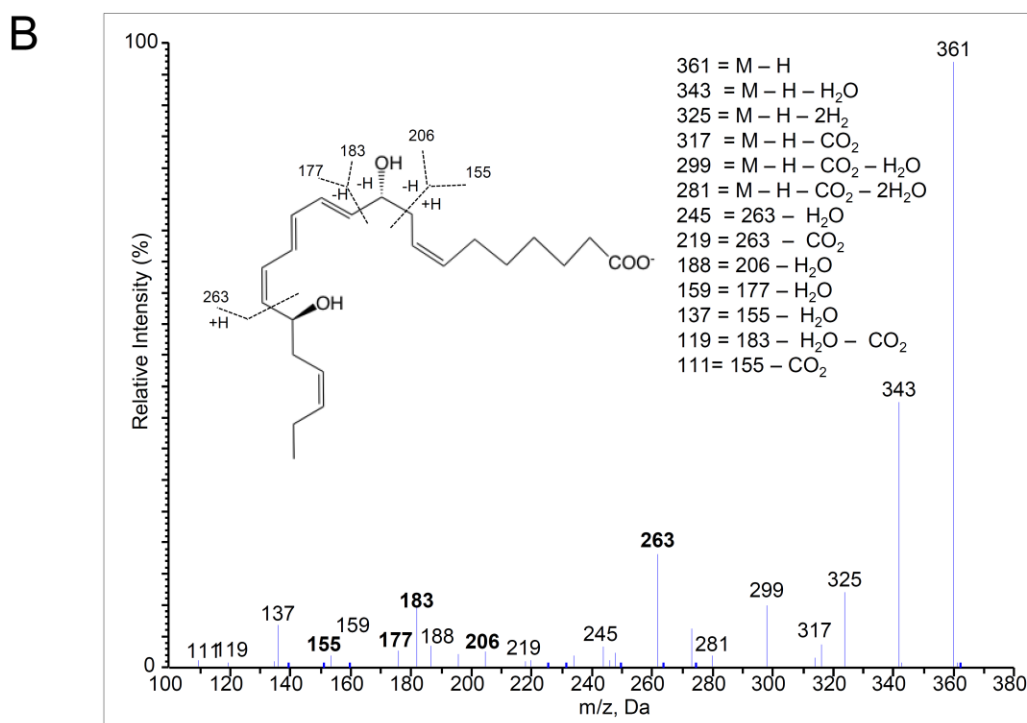

**Figure S-24** Matching MS-MS spectra for exudate PD1<sub>n-3</sub>DPA (**5**) and synthetic material **5**. Representative MS-MS spectra. A) Endogenous PD1<sub>n-3</sub>DPA (**5**) obtained from mice injected with zymosan (1 mg/mouse) and exudates collected at 4 h. MS-MS spectrum for peak at T<sub>R</sub> = 12.4 min. n = 4 mice exudates. B) MS-MS spectrum of synthetic material **5** (T<sub>R</sub> = 12.4 min). d = 4.

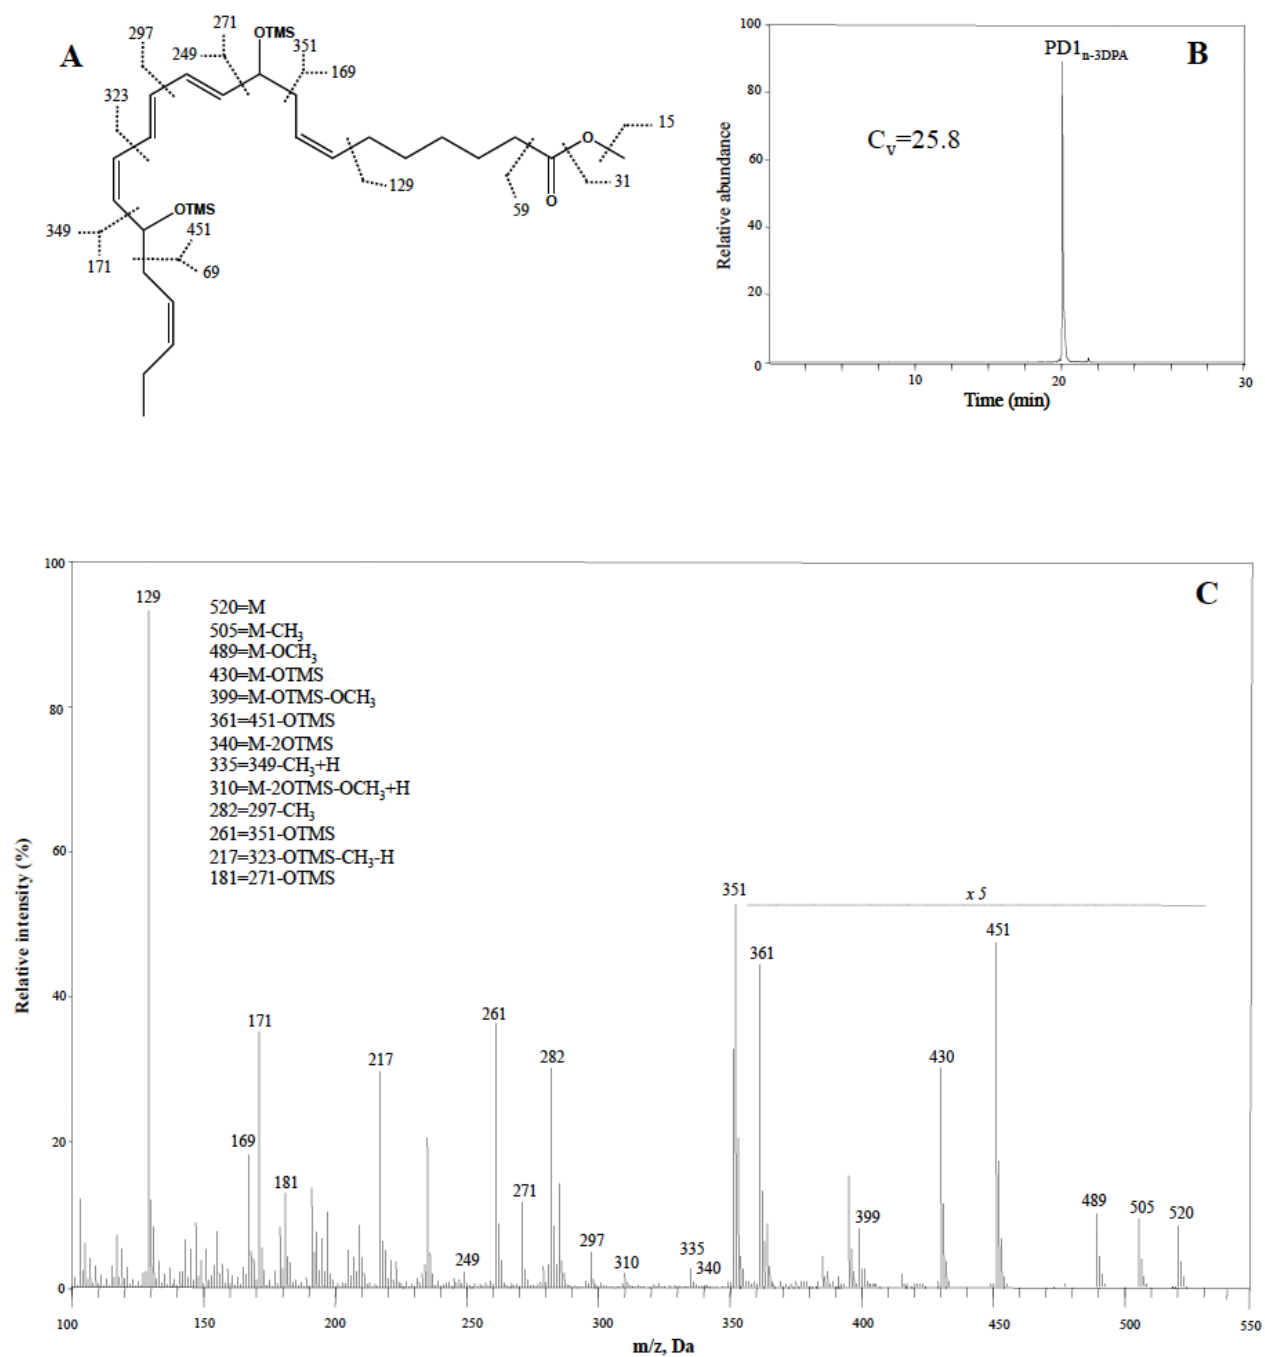

**Figure S-25** Physical properties of synthetic PD1<sub>n-3</sub> DPA (**5**) determined by GC-MS. A) Selected ion chromatogram (*m/z* 351) of PD1<sub>n-3</sub> DPA (**5**) (*T<sub>R</sub>* = 20.1 min and *C<sub>v</sub>* = 25.8). B) GC-MS spectrum of the derivatized PD1<sub>n-3</sub> DPA (**5**). MS-spectra were obtained following treatment with diazomethane and BSTFA. See experimental procedures for further details.

**Table S1.** Assigned fragments of *bis*-OTMS-methyl ester of **6** obtained from GC/MS analyses.

| Fragment<br>(m/z, Da) | Mass of Lost Fragment<br>(m/z, Da) | Fragment Assignment                                                                                                            |
|-----------------------|------------------------------------|--------------------------------------------------------------------------------------------------------------------------------|
| 520                   |                                    | M                                                                                                                              |
| 505                   | 15                                 | M-CH <sub>3</sub>                                                                                                              |
| 489                   | 31                                 | M-OCH <sub>3</sub>                                                                                                             |
| 451                   | 69                                 | M-CH <sub>2</sub> (CH) <sub>2</sub> CH <sub>2</sub> CH <sub>3</sub>                                                            |
| 430                   | 90                                 | M-OTMS                                                                                                                         |
| 399                   | 121                                | M-OTMS-OCH <sub>3</sub>                                                                                                        |
| 361                   | 159                                | M-CH <sub>2</sub> (CH) <sub>2</sub> CH <sub>2</sub> CH <sub>3</sub> -OTMS                                                      |
| 351                   | 169                                | M-(CH) <sub>2</sub> (CH <sub>2</sub> ) <sub>5</sub> COOCH <sub>3</sub>                                                         |
| 340                   | 180                                | M-(OTMS) <sub>2</sub>                                                                                                          |
| 335                   | 185                                | M-CHOTMSCH <sub>2</sub> (CH) <sub>2</sub> CH <sub>2</sub> CH <sub>3</sub> -CH <sub>2</sub> <sup>-</sup>                        |
| 310                   | 210                                | M-(OTMS) <sub>2</sub> -OCH <sub>2</sub> -                                                                                      |
| 297                   |                                    | (CH) <sub>2</sub> CHOTMSCH <sub>2</sub> (CH) <sub>2</sub> (CH <sub>2</sub> ) <sub>5</sub> COOCH <sub>3</sub>                   |
| 282                   |                                    | (CH) <sub>2</sub> CHOTMSCH <sub>2</sub> (CH) <sub>2</sub> (CH <sub>2</sub> ) <sub>5</sub> COO                                  |
| 271                   |                                    | CHOTMSCH <sub>2</sub> (CH) <sub>2</sub> (CH <sub>2</sub> ) <sub>5</sub> COOCH <sub>3</sub>                                     |
| 261                   |                                    | CHOTMS(CH) <sub>6</sub> CHCH <sub>2</sub> (CH) <sub>2</sub> CH <sub>2</sub> CH <sub>3</sub>                                    |
| 249                   | 271                                | M-CHOTMSCH <sub>2</sub> (CH) <sub>2</sub> (CH <sub>2</sub> ) <sub>5</sub> COOCH <sub>3</sub>                                   |
| 217                   | 303                                | M-(CH) <sub>2</sub> CHOTMSCH <sub>2</sub> (CH) <sub>2</sub> CH <sub>2</sub> CH <sub>3</sub> -OTMS-CH <sub>4</sub> <sup>+</sup> |
| 181                   |                                    | CHCH <sub>2</sub> (CH) <sub>2</sub> (CH <sub>2</sub> ) <sub>5</sub> COOCH <sub>3</sub>                                         |
| 171                   |                                    | CHOTMSCH <sub>2</sub> (CH) <sub>2</sub> CH <sub>2</sub> CH <sub>3</sub>                                                        |
| 169                   |                                    | CH <sub>2</sub> (CH) <sub>2</sub> (CH <sub>2</sub> ) <sub>5</sub> COOCH <sub>3</sub>                                           |
| 129                   |                                    | (CH <sub>2</sub> ) <sub>5</sub> COOCH <sub>3</sub>                                                                             |
| 81                    |                                    | CHCH <sub>2</sub> (CH) <sub>2</sub> CH <sub>2</sub> CH <sub>3</sub>                                                            |
| 73                    |                                    | TMS                                                                                                                            |
| 69                    |                                    | CH <sub>2</sub> (CH) <sub>2</sub> CH <sub>2</sub> CH <sub>3</sub>                                                              |
| 59                    |                                    | COOCH <sub>3</sub>                                                                                                             |

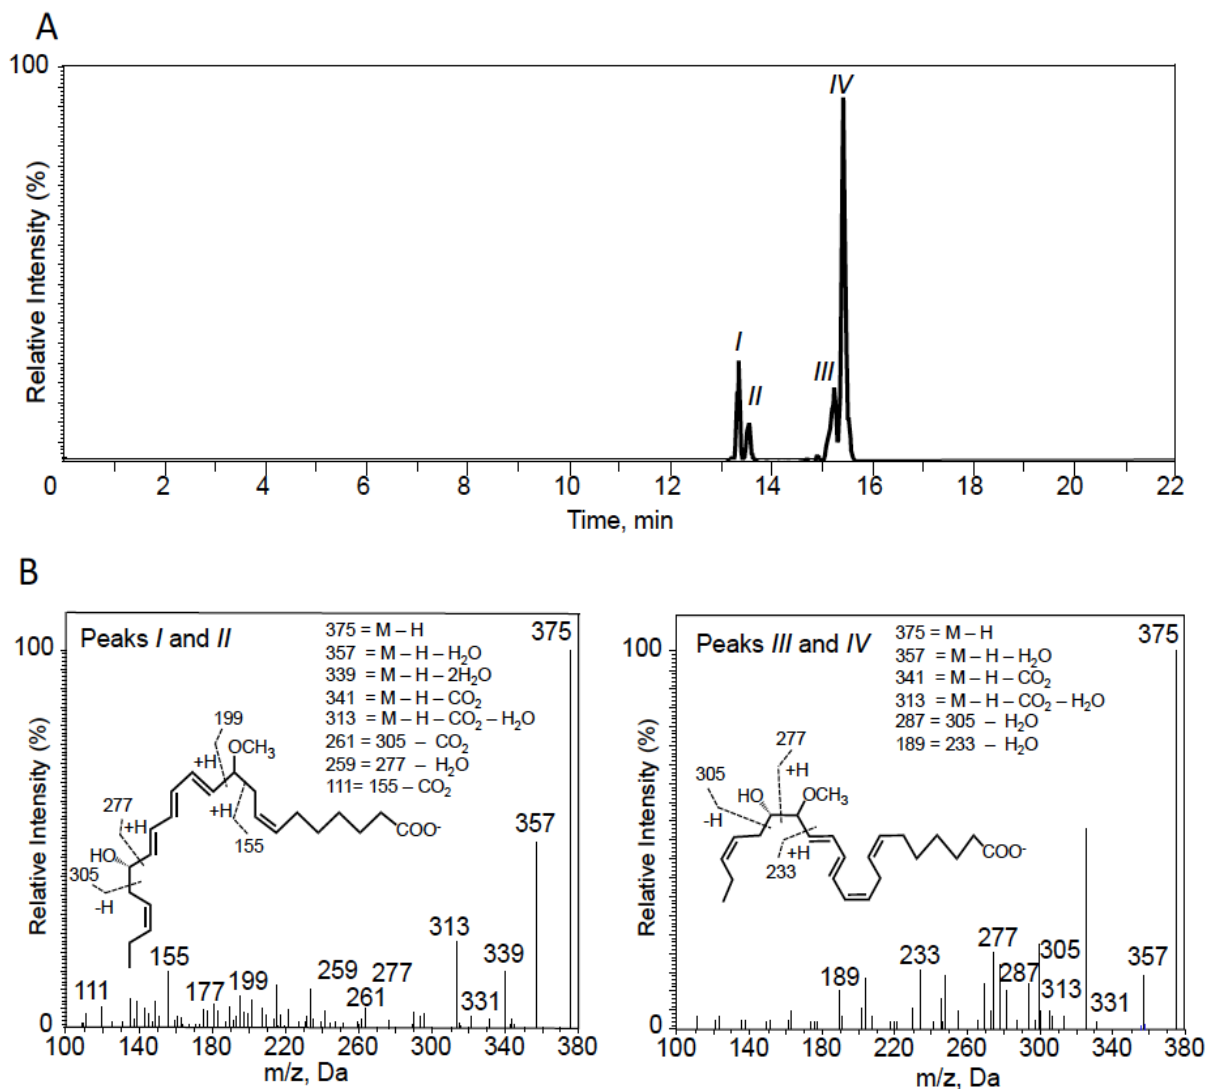

**Figure S26.** Methanol trapping products of the 16,17-epoxy-PD1<sub>n-3</sub> DPA. Soybean lipoxygenase (50U/100  $\mu$ l) was incubated with n-3 DPA (0.2  $\mu$ M, borate buffer, pH = 8.0, r.t.). The reaction was quenched with eight volumes acidified methanol (apparent pH  $\sim$ 3.5) and products assessed by lipid mediator metabololipidomics. (A) Multiple Reaction Monitoring Chromatogram (375 > 277). (B) MS-MS fragmentation patterns for products under peaks I-IV. Results are representative of n = 3 incubations.

## References

- (1) (a) Yadav, J. S.; Deshpande, P. K.; Sharma, G. V. M.; *Tetrahedron* **1992**, *48*, 4465; (b) Nicolaou, K. C.; Webber, S. E.; Ramphal, J.; Abe, Y.; *Angew. Chem.* **1987**, *99*, 1077-1079
- (2) Nagao, Y; Dai, W. M.; Ochiai, M.; Tsukagoshi, S.; Fujita, E.; *J. Org. Chem.* **1989**, *54*, 5211
- (3) Becher, B; *Org. Synth.* **1979**, *59*, 79
- (4) Soullez, D; Ple, G; Duhamel, L; Duhamel, P; *J. Chem. Soc.* **1997**, *11*, 1639
- (5) Romero-Ortega, M; Colby, D. A; Olivo, H. F; *Tetrahedron Lett.* **2002**, *43*, 6439
- (6) E. J. Corey, H. Cho, C. Rucker, D. H. Hua, *Tetrahedron Lett.* 1981, **22**, 3455
- (7) Tello-Aburto, R; Ochoa-Teran, A; Olivo, H. F; *Tetrahedron Lett.* **2006**, *47*, 5915
- (8) Kai, K; Jun Takeuchi, J; Kataoka, T; Yokoyama, M; Watanabe, N; *Tetrahedron* **2008**, *64*, 6760
- (9) a) Lucet, D ; Heyse, P; Gissot, A; Le Gall, T; Mioskowski, C; *Eur. J. Org. Chem.* **2000**, *21*, 3575, b) Starr, J. T; Koch, G; Carreira, E. M; *J. Am. Chem. Soc.* **2000**, *122*, 8793
